# Supplementary material for: Phase 3 trial to evaluate the safety, tolerability, and immunogenicity of V114, a 15-valent pneumococcal conjugate vaccine, followed by 23-valent pneumococcal polysaccharide vaccine 6 months later, in at-risk adults 18–49 years of age (PNEU-DAY): A subgroup analysis by baseline risk factors
Source: PubMed Central journal article supplement — Hum Vaccin Immunother. 2023 Mar 2;19(1):2177066. doi: 10.1080/21645515.2023.2177066 (PMC10026908; doi:10.1080/21645515.2023.2177066), 2023-03-02
Supplement: KHVI_A_2177066_SM6365.pdf [file KHVI_A_2177066_SM6365.pdf]

## Supplemental Table 1. Subgroup analysis inclusion and exclusion criteria

---

### Inclusion Criteria

---

1. Male or female 18–49 years of age (inclusive)
  2. A participant from sites other than the CAIH with  $\geq 1$  of the following risk conditions for pneumococcal disease:
    - a. Diabetes mellitus type 1 or type 2, receiving treatment with at least 1 approved antidiabetic medication; with hemoglobin A1c  $< 10\%$  at screening (Visit 1)
    - b. Chronic liver disease with compensated cirrhosis (Child-Pugh Class A) due to non-alcoholic fatty liver disease, chronic hepatitis B, chronic hepatitis C, or alcoholic liver disease, diagnosed by clinician’s assessment, with at least 1 of the following liver staging assessments. (Note: in cases in which more than 1 staging assessment is available, only 1 result may be used to determine fibrosis status. Biopsy should be preferred over every other test and FibroScan<sup>®</sup> over the blood test-based assessment. Participants with hepatitis C must have either completed a course of treatment with direct antiviral therapy and had a 12-week treatment-free follow-up or be expected to remain untreated during the duration of this study):
      - i. Prior liver biopsy demonstrating cirrhosis
      - ii. FibroScan performed with an interpretable score  $> 12.5$  kPa within 5 years of Visit 1 (screening)
      - iii. A FibroTest<sup>®</sup> (FibroSure<sup>®</sup>) with Fibrosis Score  $> 0.75$  performed within 5 years of Visit 1 and an APRI of  $> 2$  at Visit 1 (screening). APRI formula:  $AST \div \text{laboratory upper limit of normal for } AST \times 100 \div (\text{platelet count} \div 100)$  (APRI calculation to be provided by the central laboratory)
      - iv. Prior imaging study with evidence of cirrhosis and an APRI of  $> 2$  at Visit 1 (screening)
      - v. Prior imaging study with evidence of cirrhosis with splenomegaly and platelet count  $< 120,000/\mu\text{L}$  at Visit 1 (screening)
    - c. Confirmed diagnosis of COPD with spirometric data in the preceding 5 years showing post-bronchodilator FEV<sub>1</sub> over FVC ratio (FEV<sub>1</sub>/FVC)  $< 0.7$ , and FEV<sub>1</sub>  $\geq 30\%$  predicted, corresponding to spirometric GOLD Stage 1 to 3 by severity assessment. For otherwise eligible individuals with a clinical history of COPD who do not have spirometry data from the preceding 5 years, spirometry can be performed at visit 1 during the screening process by adequately trained personnel according to accepted guidelines
    - d. Confirmed diagnosis of mild or moderate persistent asthma with documented reversible airflow obstruction on spirometry consistent with guidelines for the diagnosis of asthma performed within 5 years prior to visit 1, and receipt of guideline-directed therapy for mild-to-moderate asthma. For otherwise eligible individuals with a clinical history of asthma who are receiving guideline-directed therapy for mild-to-moderate asthma but do not have spirometry data from the previous 5 years, spirometry can be performed at visit 1 during the screening process by adequately trained personnel according to accepted guidelines for assessing reversibility. Inhaled bronchodilator and/or inhaled steroid therapy should be withheld prior to spirometry for a “wash-out” as per recommended guidelines
    - e. Confirmed diagnosis of chronic heart disease due to 1 of the following conditions documented within the past 5 years. (Note: participants must have NYHA heart failure Class 1 to 3 at visit 1 [screening] and receive guideline-directed oral heart failure treatment):
      - i. Heart failure with reduced EF: TTE or TEE with left ventricular EF  $< 40\%$
-

- 
- ii. Heart failure with preserved EF as diagnosed by a cardiologist based on clinical signs and symptoms, a TTE/TEE with left ventricular EF  $\geq 50\%$ , and either 1) plasma BNP  $>100$  pg/mL or NT-proBNP  $>300$  pg/mL or 2) at least 1 prior hospitalization or emergency room visit for heart failure
  - iii. Non-cyanotic congenital heart disease
  - f. Current smoker who has smoked at least 100 cigarettes during lifetime, is currently smoking every day or most days of the week, and is not currently receiving smoking cessation therapy at visit 1 (screening) or planning to receive therapy during the study
  - g. Based on the known association of alcohol abuse/misuse with increased morbidity and mortality of pneumococcal disease<sup>40-43</sup>, all participants completed an AUDIT-C at screening. An AUDIT-C score of  $\geq 5$  identified individuals with potentially harmful alcohol use and counted as an additional risk factor for stratification purposes<sup>44</sup>
  3. Receiving stable medical management for the conditions listed in Inclusion Criterion 1a–f, if applicable, for at least 3 months with no anticipated major change expected for the duration of the study
  4. A female participant is eligible to participate if she is not pregnant, not breastfeeding, and at least 1 of the following conditions applies:
    - a. Not a WOCBP

**OR**

    - b. A WOCBP who agrees to use contraceptive methods during the treatment period and for at least 6 weeks after the last dose of study intervention
  5. The participant provides written informed consent for the study. The participant may also provide consent for future biomedical research. However, the participant may participate in the main study without participating in future biomedical research. Native American participants enrolled via the CAIH will not participate in future biomedical research

---

### **Exclusion Criteria**

---

1. History of active hepatitis with elevation in pre-treatment aspartate transaminase or alanine transaminase values  $>5$  times the upper limit of normal within 3 months of visit 1 (screening)
  2. History of diabetic ketoacidosis or  $>1$  episode of severe, symptomatic hypoglycemia within 3 months of visit 1 (screening)
  3. Myocardial infarction, acute coronary syndrome, transient ischemic attack, or ischemic or hemorrhagic stroke within 3 months of visit 1 (screening)
  4. History of severe pulmonary hypertension with World Health Organization functional class  $\geq 3$ , or history of Eisenmenger syndrome
  5. History of invasive pneumococcal disease (positive blood culture, positive cerebrospinal fluid culture, or positive culture at another sterile site) or known history of other culture-positive pneumococcal disease within 3 years of visit 2 (Day 1)
  6. Known hypersensitivity to any component of pneumococcal polysaccharide vaccine, pneumococcal conjugate vaccine, or any diphtheria toxoid-containing vaccine
  7. Known or suspected impairment of immunological function including, but not limited to a history of congenital or acquired immunodeficiency, documented HIV infection, functional or anatomic asplenia, or history of autoimmune disease
-

- 
8. History of malignancy  $\leq 5$  years prior to signing informed consent (including hepatocellular carcinoma), except for adequately treated basal cell or squamous cell skin cancer or *in situ* cervical cancer
  9. History of Stage 4 or 5 chronic kidney disease (glomerular filtration rate  $< 30$  mL/min/1.73 m<sup>2</sup>) or nephrotic syndrome
  10. History of alcohol withdrawal or alcohol withdrawal seizure in the past 12 months
  11. History of coagulation disorder contraindicating intramuscular vaccinations
  12. Recent febrile illness (defined as oral or tympanic temperature  $\geq 100.4$  °F [ $\geq 38.0$  °C]; axillary or temporal temperature  $\geq 99.4$  °F [ $\geq 37.4$  °C]; or rectal temperature  $\geq 101.4$  °F [ $\geq 38.6$  °C]) or received antibiotic therapy for any acute illness occurring within 72 hours before receipt of study vaccine
  13. History of hospitalization within 3 months of visit 1 (screening)
  14. Planned organ transplantation (heart, liver, lung, kidney, or pancreas) or other planned major surgery during the duration of this study
  15. Expected survival for less than 1 year according to the investigator's judgment
  16. A woman of childbearing potential who has a positive urine or serum pregnancy test before the first vaccination at visit 2 (Day 1)
  17. Prior administration of any pneumococcal vaccine or expected to receive any pneumococcal vaccine during the study outside of the protocol
  18. Received systemic corticosteroids (prednisone equivalent of  $\geq 20$  mg/day) for  $\geq 14$  consecutive days and has not completed intervention at least 30 days before study entry
  19. Received systemic corticosteroids exceeding physiologic replacement doses (approximately 5 mg/day prednisone equivalent) within 14 days before vaccination. (Note: topical, ophthalmic, intra-articular or soft tissue [eg, bursa, tendon steroid injections], and inhaled/nebulized steroids are permitted)
  20. Receiving immunosuppressive therapy, including chemotherapeutic agents used to treat cancer or other conditions, and interventions associated with organ or bone marrow transplantation, or autoimmune disease
  21. Receiving immunomodulatory therapy with biological agents such as monoclonal antibodies directed against interleukin or cytokine pathways that could potentially interfere with immunogenicity assessment
  22. Received any licensed, non-live vaccine within the 14 days before receipt of any study vaccine or is scheduled to receive any licensed, non-live vaccine within 30 days following receipt of any study vaccine. Exception: inactivated influenza vaccine may be administered but must be given at least 7 days before receipt of any study vaccine or at least 15 days after receipt of any study vaccine<sup>†</sup>
  23. Received any live vaccine within 30 days before receipt of any study vaccine or is scheduled to receive any live vaccine within 30 days following receipt of any study vaccine
  24. Received a blood transfusion or blood products, including immunoglobulins, within the 6 months before receipt of study vaccine or is scheduled to receive a blood transfusion or blood product within 30 days of receipt of study vaccine. Autologous blood transfusions are not considered an exclusion criterion
  25. Receiving chronic home oxygen therapy
  26. Is currently participating in, or has participated in, an interventional clinical study with an investigational compound or device within 2 months of participating in this current study
-

- 
27. Is, at the time of signing informed consent, a user of recreational or illicit drugs or has had a recent history (within the last year) of drug abuse or dependence as assessed by the study investigator
  28. Has history or current evidence of any condition, therapy, laboratory abnormality, or other circumstance that might expose the participant to risk by participating in the study, confound the results of the study, or interfere with the participant's participation for the full duration of the study
  29. Is, or has, an immediate family member (eg, spouse, parent/legal guardian, sibling, or child) who is investigational site or Sponsor staff directly involved with this study
  30. Diabetes mellitus with hemoglobin A1c  $\geq 10\%$  at visit 1 (screening)
  31. Chronic liver disease with Child-Pugh Class B or C cirrhosis at visit 1 (screening)
  32. Chronic lung disease with chronic obstructive pulmonary disease GOLD Stage 4 or severe persistent asthma at visit 1 (screening)
  33. Chronic heart disease with New York Heart Association heart failure Class 4 at visit 1 (screening)

---

APRI: AST-to-platelet ratio index; AST: aspartate aminotransferase; AUDIT-C: Alcohol Use Disorder Identification Test – Consumption; BNP: brain natriuretic peptide; CAIH: Center for American Indian Health; COPD: chronic obstructive pulmonary disease; EF: ejection fraction; FEV<sub>1</sub>: forced expiratory volume in 1 second; FVC: forced vital capacity; GOLD: Global Initiative for Chronic Obstructive Lung Disease; HIV: human immunodeficiency virus; NT-proBNP: N-terminal pro B-type natriuretic peptide; NYHA: New York Heart Association; TEE: transesophageal echocardiography; TTE: transthoracic echocardiography; WOCBP: woman of childbearing potential.

†If the participant meets these exclusion criteria at screening, the Day 1 visit may be rescheduled for a time when these criteria are not met.

**Supplemental Table 2. Summary of OPA GMTs for participants with a single risk factor**

| Pneumococcal Serotype |           | V114<br>(N = 620) |              |                     | PCV13<br>(N = 207) |              |                     |
|-----------------------|-----------|-------------------|--------------|---------------------|--------------------|--------------|---------------------|
| 13 Shared Serotypes   | Timepoint | n                 | Observed GMT | 95% CI <sup>†</sup> | n                  | Observed GMT | 95% CI <sup>†</sup> |
| <b>1</b>              | Day 1     | 597               | 7.6          | 7.0–8.3             | 200                | 8.2          | 7.0–9.6             |
|                       | Day 30    | 552               | 327.7        | 287.8–373.1         | 185                | 367.1        | 286.3–470.9         |
|                       | Month 6   | 502               | 100.7        | 87.4–115.9          | 169                | 123.2        | 93.8–161.9          |
|                       | Month 7   | 445               | 288.8        | 254.8–327.3         | 150                | 249.6        | 199.9–311.7         |
| <b>3</b>              | Day 1     | 593               | 23.4         | 21.1–25.8           | 197                | 20.0         | 17.2–23.3           |
|                       | Day 30    | 544               | 208.8        | 189.1–230.6         | 184                | 157.4        | 131.6–188.2         |
|                       | Month 6   | 494               | 114.3        | 102.8–127.2         | 167                | 82.7         | 68.1–100.4          |
|                       | Month 7   | 444               | 224.1        | 201.8–248.9         | 149                | 222.5        | 186.0–266.0         |
| <b>4</b>              | Day 1     | 590               | 56.2         | 49.3–64.0           | 196                | 46.7         | 37.7–57.9           |
|                       | Day 30    | 550               | 1594.1       | 1434.1–1772.1       | 185                | 2831.8       | 2418.7–3315.4       |
|                       | Month 6   | 503               | 722.2        | 644.7–809.0         | 169                | 1081.8       | 882.9–1325.5        |
|                       | Month 7   | 445               | 1768.5       | 1607.5–1945.6       | 152                | 1956.9       | 1695.5–2258.7       |
| <b>5</b>              | Day 1     | 598               | 19.6         | 18.2–21.1           | 200                | 19.9         | 17.5–22.7           |
|                       | Day 30    | 552               | 618.5        | 545.4–701.4         | 186                | 813.9        | 643.0–1030.1        |

---

|           |         |     |          |                   |     |          |                   |
|-----------|---------|-----|----------|-------------------|-----|----------|-------------------|
|           | Month 6 | 502 | 221.6    | 194.0–253.2       | 170 | 310.7    | 238.5–404.9       |
|           | Month 7 | 446 | 637.3    | 567.6–715.5       | 152 | 696.7    | 560.7–865.7       |
| <b>6A</b> | Day 1   | 552 | 435.1    | 388.1–487.8       | 181 | 345.2    | 285.7–417.1       |
|           | Day 30  | 544 | 12,773.3 | 11,487.3–14,203.2 | 182 | 12,514.6 | 10,248.3–15,282.0 |
|           | Month 6 | 493 | 5689.3   | 5124.5–6316.3     | 167 | 4896.7   | 4024.3–5958.2     |
|           | Month 7 | 439 | 6008.9   | 5422.0–6659.3     | 149 | 6003.8   | 4947.6–7285.5     |
| <b>6B</b> | Day 1   | 589 | 246.1    | 208.7–290.1       | 194 | 200.3    | 150.9–265.9       |
|           | Day 30  | 548 | 10,159.2 | 9270.5–11,133.1   | 185 | 6990.7   | 5688.9–8590.5     |
|           | Month 6 | 501 | 4657.8   | 4211.4–5151.5     | 168 | 3109.8   | 2479.7–3900.1     |
|           | Month 7 | 445 | 5207.4   | 4743.6–5716.6     | 152 | 4259.2   | 3550.5–5109.3     |
| <b>7F</b> | Day 1   | 559 | 601.1    | 519.8–695.2       | 192 | 503.4    | 390.6–648.9       |
|           | Day 30  | 552 | 5824.1   | 5333.2–6360.3     | 185 | 7574.3   | 6544.0–8766.7     |
|           | Month 6 | 501 | 3075.8   | 2828.8–3344.2     | 170 | 4190.4   | 3621.3–4848.9     |
|           | Month 7 | 445 | 5584.5   | 5125.1–6085.1     | 152 | 5716.9   | 4965.6–6581.9     |
| <b>9V</b> | Day 1   | 588 | 504.9    | 450.5–565.9       | 196 | 483.8    | 397.6–588.6       |
|           | Day 30  | 552 | 3455.9   | 3149.4–3792.4     | 186 | 4279.1   | 3681.6–4973.4     |
|           | Month 6 | 499 | 1814.7   | 1653.0–1992.3     | 169 | 2188.5   | 1832.6–2613.4     |
|           | Month 7 | 444 | 3015.1   | 2741.3–3316.3     | 151 | 3472.4   | 2941.2–4099.6     |
| <b>14</b> | Day 1   | 583 | 548.8    | 478.1–629.9       | 197 | 514.4    | 405.8–652.1       |

---

---

|            |         |     |        |               |     |        |               |
|------------|---------|-----|--------|---------------|-----|--------|---------------|
|            | Day 30  | 549 | 5120.4 | 4628.1–5665.1 | 186 | 5893.2 | 5014.8–6925.5 |
|            | Month 6 | 503 | 2726.8 | 2454.4–3029.5 | 168 | 3419.0 | 2831.2–4128.8 |
|            | Month 7 | 445 | 5299.8 | 4819.8–5827.7 | 152 | 5111.5 | 4301.7–6073.8 |
| <b>18C</b> | Day 1   | 586 | 192.0  | 170.8–215.8   | 195 | 175.2  | 144.1–213.0   |
|            | Day 30  | 549 | 5840.7 | 5322.5–6409.3 | 186 | 3215.0 | 2696.2–3833.6 |
|            | Month 6 | 502 | 2540.0 | 2311.4–2791.3 | 169 | 1596.2 | 1334.8–1908.9 |
|            | Month 7 | 444 | 3225.2 | 2959.6–3514.6 | 152 | 2228.6 | 1910.0–2600.4 |
| <b>19A</b> | Day 1   | 582 | 388.2  | 341.2–441.6   | 194 | 331.9  | 265.8–414.4   |
|            | Day 30  | 551 | 5508.5 | 5022.7–6041.4 | 186 | 6354.1 | 5340.4–7560.3 |
|            | Month 6 | 502 | 2648.6 | 2417.6–2901.7 | 170 | 2867.0 | 2426.9–3386.9 |
|            | Month 7 | 441 | 4521.1 | 4102.2–4982.8 | 152 | 4852.9 | 4185.2–5627.1 |
| <b>19F</b> | Day 1   | 591 | 355.1  | 317.1–397.6   | 195 | 327.9  | 269.4–399.1   |
|            | Day 30  | 552 | 3327.9 | 3045.9–3636.1 | 186 | 3328.0 | 2889.5–3833.0 |
|            | Month 6 | 502 | 1704.8 | 1557.2–1866.4 | 169 | 1838.2 | 1579.8–2139.0 |
|            | Month 7 | 446 | 3343.9 | 3083.9–3626.0 | 152 | 3004.0 | 2592.6–3480.8 |
| <b>23F</b> | Day 1   | 563 | 162.4  | 138.5–190.5   | 183 | 142.0  | 107.6–187.5   |
|            | Day 30  | 550 | 4911.5 | 4372.5–5516.8 | 184 | 3731.5 | 3017.3–4614.9 |
|            | Month 6 | 502 | 2424.7 | 2145.0–2740.8 | 169 | 1963.5 | 1569.7–2456.0 |
|            | Month 7 | 445 | 3022.2 | 2703.2–3378.8 | 152 | 2656.3 | 2138.6–3299.4 |

---

## 2 Additional Serotypes in V114

|            |         |     |          |                   |     |          |                   |
|------------|---------|-----|----------|-------------------|-----|----------|-------------------|
| <b>22F</b> | Day 1   | 535 | 204.0    | 164.9–252.3       | 182 | 128.8    | 89.5–185.4        |
|            | Day 30  | 543 | 4498.2   | 4049.2–4996.9     | 171 | 210.0    | 142.5–309.4       |
|            | Month 6 | 496 | 2188.9   | 1981.0–2418.7     | 151 | 283.3    | 189.2–424.4       |
|            | Month 7 | 441 | 4000.4   | 3630.3–4408.2     | 151 | 4386.8   | 3426.0–5617.0     |
| <b>33F</b> | Day 1   | 589 | 2086.4   | 1863.4–2336.0     | 197 | 1879.2   | 1503.4–2349.0     |
|            | Day 30  | 550 | 12,608.2 | 11,452.0–13,881.1 | 183 | 1874.0   | 1473.0–2384.3     |
|            | Month 6 | 502 | 6988.8   | 6364.6–7674.1     | 167 | 1962.6   | 1559.7–2469.4     |
|            | Month 7 | 441 | 11,884.2 | 10,700.2–13,199.2 | 151 | 18,172.6 | 14,759.9–22,374.2 |

N is the number of participants randomized and vaccinated; n is the number of participants contributing to the analysis. Per protocol, Day 1 is pre-vaccination with PCV, Day 30 is 30 days following vaccination with PCV, Month 6 is 6 months following vaccination with PCV and pre-vaccination with PPSV23, and Month 7 is 30 days following vaccination with PPSV23. Pre-defined risk factors include chronic liver, lung, and heart disease, diabetes mellitus, tobacco use, and alcohol consumption. The risk factor of alcohol consumption was defined as the AUDIT-C score  $\geq 5$ .

AUDIT-C: Alcohol Use Disorders Identification Test – Consumption; CAIH: Center for American Indian Health; CI: confidence interval; GMT: geometric mean titer (1/dilution); OPA: opsonophagocytic activity; PCV: pneumococcal conjugate vaccine; PCV13: 13-valent pneumococcal conjugate vaccine; PPSV23: 23-valent pneumococcal polysaccharide vaccine; V114: 15-valent pneumococcal conjugate vaccine.

<sup>†</sup>The within-group 95% CIs are obtained by exponentiating the CIs of the mean of the natural log values based on the t-distribution.



**Supplemental Table 3. Summary of OPA GMTs for participants with  $\geq 2$  risk factors**

| Pneumococcal Serotype |           | V114<br>(N = 228) |              |                     | PCV13<br>(N = 76) |              |                     |
|-----------------------|-----------|-------------------|--------------|---------------------|-------------------|--------------|---------------------|
| 13 Shared Serotypes   | Timepoint | n                 | Observed GMT | 95% CI <sup>†</sup> | n                 | Observed GMT | 95% CI <sup>†</sup> |
| <b>1</b>              | Day 1     | 221               | 7.7          | 6.6–8.9             | 74                | 7.2          | 5.6–9.2             |
|                       | Day 30    | 201               | 292.0        | 237.5–359.1         | 69                | 304.2        | 214.9–430.5         |
|                       | Month 6   | 195               | 91.1         | 72.5–114.4          | 63                | 102.4        | 66.8–156.9          |
|                       | Month 7   | 159               | 284.8        | 235.0–345.1         | 54                | 199.1        | 138.6–286.1         |
| <b>3</b>              | Day 1     | 221               | 24.9         | 21.0–29.6           | 74                | 20.3         | 15.8–26.1           |
|                       | Day 30    | 197               | 234.5        | 194.1–283.4         | 69                | 129.2        | 91.1–183.2          |
|                       | Month 6   | 191               | 108.6        | 90.5–130.3          | 62                | 56.6         | 41.1–78.0           |
|                       | Month 7   | 158               | 215.3        | 178.9–259.0         | 54                | 174.7        | 123.9–246.3         |
| <b>4</b>              | Day 1     | 219               | 49.8         | 40.8–60.7           | 74                | 59.0         | 41.1–84.9           |
|                       | Day 30    | 201               | 1487.6       | 1239.0–1786.0       | 69                | 2449.2       | 1845.4–3250.5       |
|                       | Month 6   | 194               | 595.1        | 484.2–731.3         | 63                | 1147.4       | 826.8–1592.4        |
|                       | Month 7   | 160               | 1619.3       | 1348.6–1944.4       | 54                | 1739.6       | 1261.0–2399.8       |
| <b>5</b>              | Day 1     | 221               | 17.5         | 15.8–19.3           | 74                | 17.5         | 14.6–21.1           |
|                       | Day 30    | 201               | 582.2        | 469.5–722.0         | 69                | 583.6        | 382.9–889.5         |

---

|           |         |     |          |                 |    |        |                 |
|-----------|---------|-----|----------|-----------------|----|--------|-----------------|
|           | Month 6 | 195 | 224.9    | 177.4–285.1     | 63 | 183.9  | 119.2–283.8     |
|           | Month 7 | 160 | 523.9    | 418.9–655.1     | 54 | 429.9  | 281.8–655.9     |
| <b>6A</b> | Day 1   | 200 | 457.7    | 381.9–548.5     | 70 | 388.2  | 286.1–526.7     |
|           | Day 30  | 199 | 11,924.9 | 9847.1–14,441.2 | 67 | 9968.8 | 6971.9–14,254.0 |
|           | Month 6 | 190 | 4999.5   | 4079.1–6127.6   | 62 | 4533.4 | 3358.5–6119.3   |
|           | Month 7 | 159 | 4430.9   | 3606.4–5444.0   | 52 | 5792.7 | 4126.9–8131.0   |
| <b>6B</b> | Day 1   | 209 | 247.4    | 189.8–322.6     | 73 | 291.3  | 187.4–452.8     |
|           | Day 30  | 201 | 9053.1   | 7673.5–10,680.9 | 69 | 5545.2 | 4001.0–7685.3   |
|           | Month 6 | 195 | 4101.6   | 3457.8–4865.3   | 63 | 3072.9 | 2222.8–4248.1   |
|           | Month 7 | 160 | 4563.4   | 3848.2–5411.6   | 54 | 4300.2 | 3184.3–5807.1   |
| <b>7F</b> | Day 1   | 208 | 632.1    | 498.8–801.0     | 69 | 719.3  | 463.4–1116.4    |
|           | Day 30  | 201 | 6399.7   | 5561.5–7364.1   | 69 | 7622.9 | 5546.4–10,476.9 |
|           | Month 6 | 194 | 3167.2   | 2772.5–3617.9   | 63 | 3902.8 | 3005.6–5067.7   |
|           | Month 7 | 160 | 6406.9   | 5513.3–7445.3   | 54 | 6333.1 | 4741.2–8459.6   |
| <b>9V</b> | Day 1   | 218 | 453.7    | 379.1–543.0     | 73 | 687.8  | 497.8–950.2     |
|           | Day 30  | 199 | 3563.8   | 3069.6–4137.5   | 69 | 3663.4 | 2859.4–4693.4   |
|           | Month 6 | 193 | 1762.8   | 1498.0–2074.5   | 62 | 1899.2 | 1393.3–2588.8   |
|           | Month 7 | 160 | 2706.8   | 2270.2–3227.4   | 54 | 2934.6 | 2244.7–3836.5   |
| <b>14</b> | Day 1   | 218 | 431.2    | 340.1–546.6     | 72 | 628.4  | 421.4–936.9     |

---

---

|            |         |     |        |               |    |        |               |
|------------|---------|-----|--------|---------------|----|--------|---------------|
|            | Day 30  | 201 | 4326.5 | 3625.3–5163.3 | 69 | 5669.1 | 4281.5–7506.4 |
|            | Month 6 | 195 | 2661.3 | 2261.4–3131.9 | 63 | 3443.9 | 2561.8–4629.8 |
|            | Month 7 | 160 | 4511.8 | 3846.2–5292.6 | 54 | 4829.6 | 3481.6–6699.5 |
| <b>18C</b> | Day 1   | 210 | 185.4  | 152.7–225.1   | 72 | 149.9  | 108.5–207.1   |
|            | Day 30  | 199 | 5836.2 | 4976.9–6843.9 | 69 | 2588.9 | 1934.4–3464.8 |
|            | Month 6 | 194 | 2593.3 | 2194.8–3064.2 | 63 | 1058.3 | 804.3–1392.5  |
|            | Month 7 | 160 | 3063.5 | 2614.1–3590.1 | 53 | 1923.3 | 1462.9–2528.7 |
| <b>19A</b> | Day 1   | 217 | 325.3  | 261.0–405.4   | 70 | 408.5  | 282.9–589.9   |
|            | Day 30  | 201 | 5016.7 | 4257.1–5911.9 | 69 | 5287.3 | 4097.2–6823.1 |
|            | Month 6 | 194 | 2353.2 | 1998.1–2771.3 | 63 | 2687.1 | 2159.2–3344.2 |
|            | Month 7 | 158 | 4223.0 | 3466.0–5145.3 | 54 | 4251.1 | 3193.8–5658.5 |
| <b>19F</b> | Day 1   | 213 | 317.7  | 264.7–381.2   | 72 | 306.7  | 220.0–427.7   |
|            | Day 30  | 200 | 2954.9 | 2555.6–3416.6 | 69 | 2698.5 | 2119.0–3436.5 |
|            | Month 6 | 195 | 1532.0 | 1300.0–1805.5 | 63 | 1432.9 | 1075.3–1909.3 |
|            | Month 7 | 160 | 2753.3 | 2339.8–3239.9 | 53 | 3616.2 | 2886.6–4530.2 |
| <b>23F</b> | Day 1   | 211 | 124.8  | 97.6–159.7    | 71 | 201.8  | 130.9–311.2   |
|            | Day 30  | 201 | 4428.2 | 3624.7–5409.9 | 69 | 3236.3 | 2189.5–4783.6 |
|            | Month 6 | 195 | 2163.7 | 1768.6–2646.9 | 63 | 2094.7 | 1432.8–3062.3 |
|            | Month 7 | 156 | 2677.4 | 2229.1–3215.7 | 54 | 2554.7 | 1761.1–3705.9 |

---

## 2 Additional Serotypes in V114

|            |         |     |        |                 |    |          |                 |
|------------|---------|-----|--------|-----------------|----|----------|-----------------|
| <b>22F</b> | Day 1   | 199 | 226.3  | 161.0–318.3     | 72 | 211.0    | 111.7–398.5     |
|            | Day 30  | 197 | 3645.7 | 3069.2–4330.5   | 65 | 305.0    | 160.2–580.9     |
|            | Month 6 | 192 | 1696.2 | 1411.0–2039.2   | 58 | 295.2    | 146.7–594.0     |
|            | Month 7 | 160 | 3108.8 | 2669.8–3619.9   | 53 | 3707.4   | 2218.8–6194.6   |
| <b>33F</b> | Day 1   | 215 | 1630.6 | 1320.3–2013.9   | 72 | 2544.0   | 1816.2–3563.4   |
|            | Day 30  | 201 | 9240.5 | 7778.9–10,976.8 | 67 | 1854.6   | 1165.9–2949.9   |
|            | Month 6 | 194 | 5632.0 | 4766.5–6654.8   | 63 | 2022.1   | 1375.3–2973.0   |
|            | Month 7 | 160 | 7708.6 | 6353.6–9352.5   | 54 | 14,364.8 | 9477.2–21,773.1 |

N is the number of participants randomized and vaccinated; n is the number of participants contributing to the analysis. Per protocol, Day 1 is pre-vaccination with PCV, Day 30 is 30 days following vaccination with PCV, Month 6 is 6 months following vaccination with PCV and pre-vaccination with PPSV23, and Month 7 is 30 days following vaccination with PPSV23. Pre-defined risk factors include chronic liver, lung and heart disease, diabetes mellitus, tobacco use, and alcohol consumption. The risk factor of alcohol consumption was defined as the AUDIT-C score  $\geq 5$ .

AUDIT-C: Alcohol Use Disorders Identification Test – Consumption; CI: confidence interval; GMT: geometric mean titer (1/dilution); OPA: opsonophagocytic activity; PCV: pneumococcal conjugate vaccine; PCV13: 13-valent pneumococcal conjugate vaccine; PPSV23: 23-valent pneumococcal polysaccharide vaccine; V114: 15-valent pneumococcal conjugate vaccine.

<sup>†</sup>The within-group 95% CIs are obtained by exponentiating the CIs of the mean of the natural log values based on the t-distribution.

**Supplemental Table 4. Summary of IgG GMCs for participants with a single risk factor**

| Pneumococcal Serotype | Timepoint | V114 (N = 620) |              |                     | PCV13 (N = 207) |              |                     |
|-----------------------|-----------|----------------|--------------|---------------------|-----------------|--------------|---------------------|
|                       |           | n              | Observed GMC | 95% CI <sup>†</sup> | n               | Observed GMC | 95% CI <sup>†</sup> |
| <b>1</b>              | Day 1     | 599            | 0.31         | 0.28–0.34           | 201             | 0.32         | 0.27–0.37           |
|                       | Day 30    | 553            | 4.01         | 3.61–4.46           | 186             | 4.86         | 4.02–5.89           |
|                       | Month 6   | 503            | 1.75         | 1.56–1.95           | 170             | 2.52         | 2.04–3.11           |
|                       | Month 7   | 446            | 3.27         | 2.97–3.60           | 152             | 3.82         | 3.21–4.55           |
| <b>3</b>              | Day 1     | 599            | 0.18         | 0.16–0.20           | 201             | 0.16         | 0.14–0.19           |
|                       | Day 30    | 551            | 0.85         | 0.78–0.93           | 186             | 0.68         | 0.58–0.80           |
|                       | Month 6   | 501            | 0.47         | 0.42–0.51           | 170             | 0.38         | 0.32–0.46           |
|                       | Month 7   | 446            | 0.74         | 0.68–0.81           | 152             | 0.76         | 0.65–0.90           |
| <b>4</b>              | Day 1     | 598            | 0.20         | 0.19–0.22           | 201             | 0.16         | 0.14–0.19           |
|                       | Day 30    | 549            | 1.85         | 1.66–2.06           | 186             | 3.07         | 2.52–3.73           |
|                       | Month 6   | 503            | 0.88         | 0.79–0.98           | 170             | 1.17         | 0.95–1.44           |
|                       | Month 7   | 446            | 1.53         | 1.38–1.70           | 151             | 1.97         | 1.63–2.37           |
| <b>5</b>              | Day 1     | 599            | 0.81         | 0.76–0.87           | 201             | 0.86         | 0.76–0.97           |
|                       | Day 30    | 553            | 3.63         | 3.23–4.08           | 186             | 4.95         | 3.93–6.24           |

---

|           |         |     |       |             |     |       |            |
|-----------|---------|-----|-------|-------------|-----|-------|------------|
|           | Month 6 | 503 | 2.02  | 1.82–2.25   | 170 | 2.92  | 2.37–3.61  |
|           | Month 7 | 446 | 3.57  | 3.19–4.00   | 152 | 4.69  | 3.84–5.72  |
| <b>6A</b> | Day 1   | 599 | 0.35  | 0.31–0.39   | 201 | 0.28  | 0.23–0.34  |
|           | Day 30  | 553 | 12.47 | 10.89–14.27 | 186 | 10.65 | 8.33–13.63 |
|           | Month 6 | 503 | 5.14  | 4.51–5.86   | 170 | 4.57  | 3.57–5.85  |
|           | Month 7 | 445 | 5.00  | 4.37–5.72   | 152 | 5.00  | 3.92–6.39  |
| <b>6B</b> | Day 1   | 599 | 0.45  | 0.40–0.50   | 201 | 0.37  | 0.31–0.44  |
|           | Day 30  | 553 | 18.02 | 15.86–20.48 | 186 | 9.97  | 7.75–12.83 |
|           | Month 6 | 503 | 7.25  | 6.40–8.22   | 170 | 4.56  | 3.52–5.90  |
|           | Month 7 | 446 | 7.67  | 6.75–8.72   | 152 | 5.81  | 4.55–7.40  |
| <b>7F</b> | Day 1   | 599 | 0.44  | 0.40–0.48   | 201 | 0.39  | 0.33–0.47  |
|           | Day 30  | 553 | 5.73  | 5.12–6.41   | 186 | 7.38  | 6.08–8.94  |
|           | Month 6 | 503 | 2.64  | 2.35–2.96   | 170 | 3.21  | 2.61–3.95  |
|           | Month 7 | 446 | 4.19  | 3.75–4.67   | 152 | 4.64  | 3.83–5.63  |
| <b>9V</b> | Day 1   | 599 | 0.43  | 0.39–0.47   | 201 | 0.38  | 0.32–0.44  |
|           | Day 30  | 553 | 4.75  | 4.26–5.29   | 186 | 5.25  | 4.33–6.36  |
|           | Month 6 | 502 | 2.40  | 2.15–2.67   | 170 | 2.56  | 2.09–3.13  |
|           | Month 7 | 446 | 3.43  | 3.09–3.81   | 152 | 3.76  | 3.10–4.55  |
| <b>14</b> | Day 1   | 599 | 1.59  | 1.40–1.81   | 201 | 1.49  | 1.19–1.86  |

---

---

|            |         |     |       |             |     |       |             |
|------------|---------|-----|-------|-------------|-----|-------|-------------|
|            | Day 30  | 553 | 16.77 | 14.69–19.15 | 186 | 17.35 | 14.04–21.44 |
|            | Month 6 | 502 | 10.05 | 8.80–11.47  | 170 | 11.07 | 8.98–13.66  |
|            | Month 7 | 446 | 15.66 | 13.84–17.71 | 152 | 15.43 | 12.53–19.00 |
| <b>18C</b> | Day 1   | 599 | 0.52  | 0.47–0.57   | 201 | 0.44  | 0.37–0.52   |
|            | Day 30  | 553 | 15.60 | 13.96–17.44 | 186 | 9.38  | 7.62–11.54  |
|            | Month 6 | 503 | 6.36  | 5.67–7.12   | 170 | 3.86  | 3.16–4.73   |
|            | Month 7 | 446 | 6.36  | 5.66–7.14   | 152 | 4.27  | 3.53–5.16   |
| <b>19A</b> | Day 1   | 599 | 1.71  | 1.57–1.86   | 201 | 1.36  | 1.18–1.58   |
|            | Day 30  | 553 | 18.61 | 16.77–20.65 | 186 | 19.19 | 15.51–23.75 |
|            | Month 6 | 502 | 8.46  | 7.66–9.34   | 170 | 8.16  | 6.58–10.12  |
|            | Month 7 | 446 | 11.61 | 10.47–12.89 | 152 | 11.38 | 9.30–13.91  |
| <b>19F</b> | Day 1   | 599 | 0.91  | 0.82–1.01   | 201 | 0.73  | 0.61–0.87   |
|            | Day 30  | 552 | 12.92 | 11.55–14.45 | 186 | 11.39 | 9.29–13.96  |
|            | Month 6 | 503 | 5.47  | 4.90–6.10   | 170 | 4.88  | 3.97–6.00   |
|            | Month 7 | 446 | 8.77  | 7.94–9.69   | 152 | 8.23  | 6.82–9.94   |
| <b>23F</b> | Day 1   | 599 | 0.49  | 0.44–0.55   | 201 | 0.50  | 0.42–0.60   |
|            | Day 30  | 552 | 14.06 | 12.46–15.86 | 186 | 10.63 | 8.59–13.16  |
|            | Month 6 | 502 | 5.55  | 4.93–6.25   | 170 | 4.71  | 3.77–5.90   |
|            | Month 7 | 446 | 5.90  | 5.23–6.64   | 152 | 5.40  | 4.36–6.68   |

---

## 2 Additional Serotypes in V114

|            |         |     |      |           |     |      |            |
|------------|---------|-----|------|-----------|-----|------|------------|
| <b>22F</b> | Day 1   | 599 | 0.45 | 0.40–0.51 | 201 | 0.41 | 0.34–0.50  |
|            | Day 30  | 553 | 6.49 | 5.81–7.24 | 186 | 0.43 | 0.35–0.52  |
|            | Month 6 | 503 | 2.83 | 2.55–3.15 | 170 | 0.45 | 0.36–0.55  |
|            | Month 7 | 446 | 5.04 | 4.55–5.59 | 152 | 5.91 | 4.67–7.47  |
| <b>33F</b> | Day 1   | 599 | 0.95 | 0.86–1.05 | 201 | 0.90 | 0.75–1.07  |
|            | Day 30  | 553 | 7.94 | 7.06–8.93 | 185 | 0.89 | 0.75–1.06  |
|            | Month 6 | 503 | 4.12 | 3.67–4.64 | 170 | 0.88 | 0.73–1.06  |
|            | Month 7 | 446 | 6.28 | 5.59–7.07 | 152 | 9.74 | 7.71–12.30 |

N is the number of participants randomized and vaccinated; n is the number of participants contributing to the analysis. Per protocol, Day 1 is pre-vaccination with PCV, Day 30 is 30 days following vaccination with PCV, Month 6 is 6 months following vaccination with PCV and pre-vaccination with PPSV23, and Month 7 is 30 days following vaccination with PPSV23. Pre-defined risk factors include chronic liver, lung, and heart disease, diabetes mellitus, tobacco use, and alcohol consumption. The risk factor of alcohol consumption was defined as the AUDIT-C score  $\geq 5$ .

AUDIT-C: Alcohol Use Disorders Identification Test – Consumption; CAIH: Center for American Indian Health; CI: confidence interval; GMC: geometric mean concentration; IgG: immunoglobulin G; PCV: pneumococcal conjugate vaccine; PCV13: 13-valent pneumococcal conjugate vaccine; PPSV23: 23-valent pneumococcal polysaccharide vaccine; V114: 15-valent pneumococcal conjugate vaccine.

<sup>†</sup>The within-group 95% CIs are obtained by exponentiating the CIs of the mean of the natural log values based on the t-distribution.



**Supplemental Table 5. Summary of IgG GMCs for participants with  $\geq 2$  risk factors**

| Pneumococcal Serotype | Timepoint | V114 (N = 228) |              |                     | PCV13 (N = 76) |              |                     |
|-----------------------|-----------|----------------|--------------|---------------------|----------------|--------------|---------------------|
|                       |           | n              | Observed GMC | 95% CI <sup>†</sup> | n              | Observed GMC | 95% CI <sup>†</sup> |
| <b>1</b>              | Day 1     | 221            | 0.30         | 0.26–0.34           | 74             | 0.24         | 0.19–0.31           |
|                       | Day 30    | 201            | 3.77         | 3.19–4.45           | 69             | 4.62         | 3.45–6.19           |
|                       | Month 6   | 195            | 1.61         | 1.37–1.91           | 63             | 2.29         | 1.66–3.16           |
|                       | Month 7   | 160            | 3.13         | 2.66–3.68           | 54             | 3.07         | 2.31–4.08           |
| <b>3</b>              | Day 1     | 221            | 0.18         | 0.15–0.21           | 74             | 0.14         | 0.11–0.18           |
|                       | Day 30    | 201            | 0.87         | 0.74–1.03           | 69             | 0.58         | 0.46–0.73           |
|                       | Month 6   | 195            | 0.47         | 0.40–0.55           | 63             | 0.32         | 0.25–0.40           |
|                       | Month 7   | 160            | 0.74         | 0.63–0.86           | 54             | 0.66         | 0.51–0.86           |
| <b>4</b>              | Day 1     | 220            | 0.20         | 0.17–0.23           | 74             | 0.16         | 0.13–0.20           |
|                       | Day 30    | 201            | 1.72         | 1.42–2.10           | 69             | 2.84         | 1.99–4.05           |
|                       | Month 6   | 195            | 0.87         | 0.73–1.05           | 63             | 1.34         | 0.94–1.91           |
|                       | Month 7   | 160            | 1.59         | 1.32–1.93           | 54             | 2.08         | 1.50–2.89           |
| <b>5</b>              | Day 1     | 221            | 0.90         | 0.81–1.00           | 74             | 0.93         | 0.74–1.17           |
|                       | Day 30    | 201            | 3.62         | 2.97–4.40           | 69             | 4.20         | 2.85–6.19           |

---

|           |         |     |       |             |    |       |            |
|-----------|---------|-----|-------|-------------|----|-------|------------|
|           | Month 6 | 195 | 2.18  | 1.82–2.61   | 63 | 2.33  | 1.65–3.28  |
|           | Month 7 | 160 | 4.07  | 3.36–4.93   | 54 | 3.08  | 2.15–4.40  |
| <b>6A</b> | Day 1   | 221 | 0.32  | 0.27–0.38   | 74 | 0.38  | 0.27–0.55  |
|           | Day 30  | 201 | 11.27 | 8.94–14.20  | 69 | 9.59  | 6.00–15.31 |
|           | Month 6 | 195 | 4.16  | 3.32–5.20   | 63 | 4.54  | 2.85–7.23  |
|           | Month 7 | 160 | 3.96  | 3.12–5.02   | 54 | 5.17  | 3.20–8.36  |
| <b>6B</b> | Day 1   | 220 | 0.43  | 0.36–0.52   | 74 | 0.39  | 0.29–0.52  |
|           | Day 30  | 201 | 16.00 | 12.55–20.41 | 69 | 10.31 | 6.67–15.92 |
|           | Month 6 | 195 | 6.34  | 5.00–8.04   | 63 | 4.69  | 3.03–7.26  |
|           | Month 7 | 160 | 6.67  | 5.20–8.54   | 54 | 6.12  | 4.05–9.24  |
| <b>7F</b> | Day 1   | 221 | 0.48  | 0.41–0.57   | 74 | 0.49  | 0.38–0.64  |
|           | Day 30  | 201 | 6.51  | 5.43–7.81   | 69 | 8.92  | 6.40–12.43 |
|           | Month 6 | 195 | 2.88  | 2.40–3.44   | 63 | 4.33  | 3.13–5.99  |
|           | Month 7 | 160 | 5.01  | 4.18–5.99   | 54 | 5.09  | 3.68–7.04  |
| <b>9V</b> | Day 1   | 221 | 0.41  | 0.35–0.48   | 74 | 0.45  | 0.33–0.60  |
|           | Day 30  | 201 | 4.88  | 4.09–5.83   | 69 | 5.46  | 4.04–7.38  |
|           | Month 6 | 194 | 2.49  | 2.12–2.93   | 63 | 3.06  | 2.24–4.18  |
|           | Month 7 | 160 | 3.92  | 3.34–4.60   | 54 | 4.21  | 3.18–5.56  |
| <b>14</b> | Day 1   | 221 | 1.58  | 1.27–1.97   | 74 | 1.81  | 1.19–2.74  |

---

---

|            |         |     |       |             |    |       |             |
|------------|---------|-----|-------|-------------|----|-------|-------------|
|            | Day 30  | 201 | 16.77 | 13.55–20.75 | 69 | 22.12 | 16.04–30.50 |
|            | Month 6 | 195 | 10.20 | 8.39–12.40  | 63 | 13.68 | 9.58–19.54  |
|            | Month 7 | 160 | 16.40 | 13.78–19.54 | 54 | 21.45 | 15.66–29.37 |
| <b>18C</b> | Day 1   | 221 | 0.52  | 0.45–0.62   | 74 | 0.55  | 0.41–0.73   |
|            | Day 30  | 201 | 15.26 | 12.87–18.11 | 69 | 9.32  | 6.81–12.76  |
|            | Month 6 | 195 | 6.16  | 5.19–7.31   | 63 | 4.64  | 3.53–6.10   |
|            | Month 7 | 160 | 5.97  | 4.98–7.16   | 54 | 5.10  | 3.93–6.63   |
| <b>19A</b> | Day 1   | 221 | 1.44  | 1.24–1.68   | 74 | 1.43  | 1.10–1.87   |
|            | Day 30  | 201 | 15.24 | 12.80–18.15 | 69 | 19.91 | 14.49–27.36 |
|            | Month 6 | 195 | 7.29  | 6.18–8.61   | 63 | 8.81  | 6.55–11.85  |
|            | Month 7 | 160 | 9.59  | 8.08–11.38  | 54 | 12.35 | 9.35–16.32  |
| <b>19F</b> | Day 1   | 221 | 0.87  | 0.73–1.03   | 74 | 0.81  | 0.62–1.06   |
|            | Day 30  | 201 | 10.56 | 8.84–12.62  | 69 | 12.25 | 8.64–17.36  |
|            | Month 6 | 195 | 5.07  | 4.28–6.00   | 63 | 5.24  | 3.69–7.46   |
|            | Month 7 | 160 | 8.09  | 6.84–9.56   | 54 | 8.92  | 6.69–11.88  |
| <b>23F</b> | Day 1   | 221 | 0.49  | 0.41–0.58   | 74 | 0.38  | 0.28–0.52   |
|            | Day 30  | 201 | 12.58 | 10.39–15.24 | 69 | 7.72  | 5.05–11.81  |
|            | Month 6 | 195 | 5.02  | 4.19–6.01   | 63 | 3.11  | 2.02–4.78   |
|            | Month 7 | 160 | 5.77  | 4.77–6.97   | 54 | 3.56  | 2.29–5.55   |

---

## 2 Additional Serotypes in V114

|            |         |     |      |           |    |      |            |
|------------|---------|-----|------|-----------|----|------|------------|
| <b>22F</b> | Day 1   | 221 | 0.41 | 0.34–0.49 | 74 | 0.36 | 0.25–0.50  |
|            | Day 30  | 201 | 5.39 | 4.45–6.54 | 68 | 0.41 | 0.30–0.57  |
|            | Month 6 | 195 | 2.52 | 2.08–3.05 | 63 | 0.38 | 0.27–0.53  |
|            | Month 7 | 160 | 4.33 | 3.59–5.21 | 54 | 2.81 | 1.92–4.10  |
| <b>33F</b> | Day 1   | 221 | 0.89 | 0.76–1.05 | 74 | 0.71 | 0.52–0.97  |
|            | Day 30  | 201 | 7.92 | 6.52–9.62 | 69 | 0.74 | 0.56–0.98  |
|            | Month 6 | 195 | 3.99 | 3.31–4.80 | 63 | 0.70 | 0.51–0.96  |
|            | Month 7 | 160 | 6.03 | 5.03–7.23 | 54 | 7.02 | 4.71–10.46 |

N is the number of participants randomized and vaccinated; n is the number of participants contributing to the analysis. Per protocol, Day 1 is pre-vaccination with PCV, Day 30 is 30 days following vaccination with PCV, Month 6 is 6 months following vaccination with PCV and pre-vaccination with PPSV23, and Month 7 is 30 days following vaccination with PPSV23. Pre-defined risk factors include chronic liver, lung, and heart disease, diabetes mellitus, tobacco use, and alcohol consumption. The risk factor of alcohol consumption was defined as the AUDIT-C score  $\geq 5$ .

AUDIT-C: Alcohol Use Disorders Identification Test – Consumption; CI: confidence interval; GMC: geometric mean concentration; IgG: immunoglobulin G; PCV: pneumococcal conjugate vaccine; PCV13: 13-valent pneumococcal conjugate vaccine; PPSV23: 23-valent pneumococcal polysaccharide vaccine; V114: 15-valent pneumococcal conjugate vaccine.

<sup>†</sup>The within-group 95% CIs are obtained by exponentiating the CIs of the mean of the natural log values based on the t-distribution.

**Supplemental Table 6. Summary of OPA antibody responses for participants with one risk factor**

| Pneumococcal Serotype      | Endpoint              | Timepoint          | V114<br>N = 620 |                    |                     | PCV13<br>N = 207 |                   |                     |
|----------------------------|-----------------------|--------------------|-----------------|--------------------|---------------------|------------------|-------------------|---------------------|
|                            |                       |                    | n               | Observed Response  | 95% CI <sup>†</sup> | n                | Observed Response | 95% CI <sup>†</sup> |
| <b>13 Shared Serotypes</b> |                       |                    |                 |                    |                     |                  |                   |                     |
| <b>1</b>                   | <b>GMT</b>            | Day 1              | 597             | 7.6                | 7.0–8.3             | 200              | 8.2               | 7.0–9.6             |
|                            |                       | Day 30             | 552             | 327.7              | 287.8–373.1         | 185              | 367.1             | 286.3–470.9         |
|                            |                       | Month 6            | 502             | 100.7              | 87.4–115.9          | 169              | 123.2             | 93.8–161.9          |
|                            |                       | Month 7            | 445             | 288.8              | 254.8–327.3         | 150              | 249.6             | 199.9–311.7         |
|                            | <b>GMFR</b>           | Day 1 to Day 30    | 540             | 26.4               | 23.0–30.2           | 181              | 26.6              | 20.9–33.7           |
|                            |                       | Day 1 to Month 7   | 435             | 23.7               | 20.8–27.0           | 148              | 18.3              | 14.7–22.7           |
|                            |                       | Month 6 to Month 7 | 443             | 2.8                | 2.5–3.1             | 150              | 1.7               | 1.5–2.0             |
|                            | <b>% ≥4-fold rise</b> | Day 1 to Day 30    | 540             | 85.7%<br>(463/540) | 82.5–88.6           | 181              | 83.4% (151/181)   | 77.2–88.5           |
|                            |                       | Day 1 to Month 7   | 435             | 87.4%<br>(380/435) | 83.9–90.3           | 148              | 85.8% (127/148)   | 79.1–91.0           |
|                            |                       | Month 6 to Month 7 | 443             | 34.1%<br>(151/443) | 29.7–38.7           | 150              | 17.3% (26/150)    | 11.6–24.4           |
| <b>3</b>                   | <b>GMT</b>            | Day 1              | 593             | 23.4               | 21.1–25.8           | 197              | 20.0              | 17.2–23.3           |
|                            |                       | Day 30             | 544             | 208.8              | 189.1–230.6         | 184              | 157.4             | 131.6–188.2         |
|                            |                       | Month 6            | 494             | 114.3              | 102.8–127.2         | 167              | 82.7              | 68.1–100.4          |
|                            |                       | Month 7            | 444             | 224.1              | 201.8–248.9         | 149              | 222.5             | 186.0–266.0         |
|                            | <b>GMFR</b>           | Day 1 to Day 30    | 529             | 6.2                | 5.6–6.9             | 178              | 5.3               | 4.5–6.2             |
|                            |                       | Day 1 to Month 7   | 433             | 6.5                | 5.8–7.2             | 145              | 7.2               | 6.1–8.6             |
|                            |                       | Month 6 to Month 7 | 437             | 2.0                | 1.8–2.1             | 147              | 2.5               | 2.1–2.8             |
|                            | <b>% ≥4-fold rise</b> | Day 1 to Day 30    | 529             | 65.0%<br>(344/529) | 60.8–69.1           | 178              | 60.1% (107/178)   | 52.5–67.4           |
|                            |                       | Day 1 to Month 7   | 433             | 68.8%<br>(298/433) | 64.2–73.2           | 145              | 73.8% (107/145)   | 65.8–80.7           |

|           |                       |                    |     |                    |                     |     |                 |                 |
|-----------|-----------------------|--------------------|-----|--------------------|---------------------|-----|-----------------|-----------------|
| <b>4</b>  | <b>GMT</b>            | Month 6 to Month 7 | 437 | 19.0% (83/437)     | 15.4–23.0           | 147 | 26.5% (39/147)  | 19.6–34.4       |
|           |                       | Day 1              | 590 | 56.2               | 49.3–64.0           | 196 | 46.7            | 37.7–57.9       |
|           |                       | Day 30             | 550 | 1594.1             | 1434.1–1772.1       | 185 | 2831.8          | 2418.7–3315.4   |
|           |                       | Month 6            | 503 | 722.2              | 644.7–809.0         | 169 | 1081.8          | 882.9–1325.5    |
|           | <b>GMFR</b>           | Month 7            | 445 | 1768.5             | 1607.5–1945.6       | 152 | 1956.9          | 1695.5–2258.7   |
|           |                       | Day 1 to Day 30    | 531 | 19.4               | 16.9–22.3           | 178 | 39.0            | 30.8–49.4       |
|           |                       | Day 1 to Month 7   | 432 | 22.0               | 19.2–25.3           | 147 | 26.7            | 21.3–33.5       |
|           | <b>% ≥4-fold rise</b> | Month 6 to Month 7 | 444 | 2.5                | 2.2–2.8             | 151 | 1.7             | 1.4–2.0         |
|           |                       | Day 1 to Day 30    | 531 | 80.0%<br>(425/531) | 76.4–83.4           | 178 | 89.3% (159/178) | 83.8–93.4       |
|           |                       | Day 1 to Month 7   | 432 | 85.0%<br>(367/432) | 81.2–88.2           | 147 | 87.1% (128/147) | 80.6–92.0       |
| <b>5</b>  | <b>GMT</b>            | Month 6 to Month 7 | 444 | 27.9%<br>(124/444) | 23.8–32.4           | 151 | 15.9% (24/151)  | 10.5–22.7       |
|           |                       | Day 1              | 598 | 19.6               | 18.2–21.1           | 200 | 19.9            | 17.5–22.7       |
|           |                       | Day 30             | 552 | 618.5              | 545.4–701.4         | 186 | 813.9           | 643.0–1030.1    |
|           |                       | Month 6            | 502 | 221.6              | 194.0–253.2         | 170 | 310.7           | 238.5–404.9     |
|           | <b>GMFR</b>           | Month 7            | 446 | 637.3              | 567.6–715.5         | 152 | 696.7           | 560.7–865.7     |
|           |                       | Day 1 to Day 30    | 541 | 18.6               | 16.5–21.1           | 182 | 23.0            | 18.6–28.4       |
|           |                       | Day 1 to Month 7   | 437 | 19.0               | 16.9–21.3           | 150 | 19.8            | 16.2–24.1       |
|           | <b>% ≥4-fold rise</b> | Month 6 to Month 7 | 444 | 2.8                | 2.5–3.1             | 152 | 1.9             | 1.6–2.3         |
|           |                       | Day 1 to Day 30    | 541 | 85.4%<br>(462/541) | 82.1–88.3           | 182 | 85.7% (156/182) | 79.8–90.5       |
|           |                       | Day 1 to Month 7   | 437 | 87.9%<br>(384/437) | 84.4–90.8           | 150 | 87.3% (131/150) | 80.9–92.2       |
| <b>6A</b> | <b>GMT</b>            | Month 6 to Month 7 | 444 | 33.6%<br>(149/444) | 29.2–38.2           | 152 | 18.4% (28/152)  | 12.6–25.5       |
|           |                       | Day 1              | 552 | 435.1              | 388.1–487.8         | 181 | 345.2           | 285.7–417.1     |
|           |                       | Day 30             | 544 | 12773.3            | 11487.3–<br>14203.2 | 182 | 12514.6         | 10248.3–15282.0 |
|           |                       | Month 6            | 493 | 5689.3             | 5124.5–6316.3       | 167 | 4896.7          | 4024.3–5958.2   |
|           | <b>GMFR</b>           | Month 7            | 437 | 6008.9             | 5422.0–6659.3       | 149 | 6003.8          | 4947.6–7285.5   |
|           |                       | Day 1 to Day 30    | 493 | 22.0               | 19.2–25.1           | 162 | 25.0            | 19.9–31.5       |
|           |                       | Day 1 to Month 7   | 398 | 10.1               | 8.9–11.4            | 134 | 12.4            | 9.9–15.5        |
|           | Month 6 to Month 7    | 431                | 1.0 | 1.0–1.1            | 146                 | 1.2 | 1.0–1.3         |                 |

|                       |                       |                    |                    |                    |                |                 |                 |               |           |
|-----------------------|-----------------------|--------------------|--------------------|--------------------|----------------|-----------------|-----------------|---------------|-----------|
| <b>6B</b>             | <b>% ≥4-fold rise</b> | Day 1 to Day 30    | 493                | 86.4%<br>(426/493) | 83.1–89.3      | 162             | 88.9% (144/162) | 83.0–93.3     |           |
|                       |                       | Day 1 to Month 7   | 398                | 74.6%<br>(297/398) | 70.0–78.8      | 134             | 84.3% (113/134) | 77.0–90.0     |           |
|                       | <b>GMT</b>            | Month 6 to Month 7 | 431                | 4.4% (19/431)      | 2.7–6.8        | 146             | 5.5% (8/146)    | 2.4–10.5      |           |
|                       |                       | Day 1              | 589                | 246.1              | 208.7–290.1    | 194             | 200.3           | 150.9–265.9   |           |
|                       |                       | Day 30             | 548                | 10159.2            | 9270.5–11133.1 | 185             | 6990.7          | 5688.9–8590.5 |           |
|                       |                       | Month 6            | 501                | 4657.8             | 4211.4–5151.5  | 168             | 3109.8          | 2479.7–3900.1 |           |
|                       |                       | Month 7            | 445                | 5207.4             | 4743.6–5716.6  | 152             | 4259.2          | 3550.5–5109.3 |           |
|                       |                       | <b>GMFR</b>        | Day 1 to Day 30    | 530                | 31.5           | 26.8–37.1       | 176             | 27.1          | 20.8–35.3 |
|                       |                       |                    | Day 1 to Month 7   | 429                | 16.3           | 13.9–19.2       | 146             | 16.3          | 12.4–21.4 |
|                       |                       |                    | Month 6 to Month 7 | 444                | 1.1            | 1.0–1.2         | 150             | 1.3           | 1.2–1.5   |
| <b>% ≥4-fold rise</b> | Day 1 to Day 30       | 530                | 83.6%<br>(443/530) | 80.2–86.6          | 176            | 86.9% (153/176) | 81.0–91.5       |               |           |
|                       | Day 1 to Month 7      | 429                | 75.8%<br>(325/429) | 71.4–79.7          | 146            | 75.3% (110/146) | 67.5–82.1       |               |           |
| <b>7F</b>             | <b>GMT</b>            | Month 6 to Month 7 | 444                | 4.3% (19/444)      | 2.6–6.6        | 150             | 7.3% (11/150)   | 3.7–12.7      |           |
|                       |                       | Day 1              | 559                | 601.1              | 519.8–695.2    | 192             | 503.4           | 390.6–648.9   |           |
|                       |                       | Day 30             | 552                | 5824.1             | 5333.2–6360.3  | 185             | 7574.3          | 6544.0–8766.7 |           |
|                       |                       | Month 6            | 501                | 3075.8             | 2828.8–3344.2  | 170             | 4190.4          | 3621.3–4848.9 |           |
|                       |                       | Month 7            | 445                | 5584.5             | 5125.1–6085.1  | 152             | 5716.9          | 4965.6–6581.9 |           |
|                       | <b>GMFR</b>           | Day 1 to Day 30    | 507                | 8.1                | 7.0–9.4        | 175             | 12.4            | 9.6–16.0      |           |
|                       |                       | Day 1 to Month 7   | 407                | 8.1                | 7.0–9.4        | 143             | 10.0            | 7.7–13.1      |           |
|                       |                       | Month 6 to Month 7 | 442                | 1.9                | 1.7–2.0        | 152             | 1.4             | 1.2–1.5       |           |
|                       | <b>% ≥4-fold rise</b> | Day 1 to Day 30    | 507                | 59.4%<br>(301/507) | 55.0–63.7      | 175             | 67.4% (118/175) | 59.9–74.3     |           |
|                       |                       | Day 1 to Month 7   | 407                | 63.9%<br>(260/407) | 59.0–68.6      | 143             | 64.3% (92/143)  | 55.9–72.2     |           |
| <b>9V</b>             | <b>GMT</b>            | Month 6 to Month 7 | 442                | 13.1% (58/442)     | 10.1–16.6      | 152             | 5.3% (8/152)    | 2.3–10.1      |           |
|                       |                       | Day 1              | 588                | 504.9              | 450.5–565.9    | 196             | 483.8           | 397.6–588.6   |           |
|                       |                       | Day 30             | 552                | 3455.9             | 3149.4–3792.4  | 186             | 4279.1          | 3681.6–4973.4 |           |
|                       |                       | Month 6            | 499                | 1814.7             | 1653.0–1992.3  | 169             | 2188.5          | 1832.6–2613.4 |           |
|                       |                       | Month 7            | 444                | 3015.1             | 2741.3–3316.3  | 151             | 3472.4          | 2941.2–4099.6 |           |
|                       | <b>GMFR</b>           | Day 1 to Day 30    | 531                | 5.7                | 5.1–6.4        | 178             | 7.3             | 6.1–8.9       |           |
| Day 1 to Month 7      |                       | 426                | 4.9                | 4.3–5.5            | 145            | 6.0             | 4.8–7.4         |               |           |

|            |                       |                    |     |                    |               |     |                 |               |
|------------|-----------------------|--------------------|-----|--------------------|---------------|-----|-----------------|---------------|
|            |                       | Month 6 to Month 7 | 440 | 1.6                | 1.5–1.7       | 150 | 1.6             | 1.4–1.8       |
|            | <b>% ≥4-fold rise</b> | Day 1 to Day 30    | 531 | 55.4%<br>(294/531) | 51.0–59.6     | 178 | 64.0% (114/178) | 56.5–71.1     |
|            |                       | Day 1 to Month 7   | 426 | 50.2%<br>(214/426) | 45.4–55.1     | 145 | 57.9% (84/145)  | 49.5–66.1     |
| <b>14</b>  | <b>GMT</b>            | Month 6 to Month 7 | 440 | 11.6% (51/440)     | 8.8–15.0      | 150 | 10.7% (16/150)  | 6.2–16.7      |
|            |                       | Day 1              | 583 | 548.8              | 478.1–629.9   | 197 | 514.4           | 405.8–652.1   |
|            |                       | Day 30             | 549 | 5120.4             | 4628.1–5665.1 | 186 | 5893.2          | 5014.8–6925.5 |
|            |                       | Month 6            | 503 | 2726.8             | 2454.4–3029.5 | 168 | 3419.0          | 2831.2–4128.8 |
|            |                       | Month 7            | 445 | 5299.8             | 4819.8–5827.7 | 152 | 5111.5          | 4301.7–6073.8 |
|            | <b>GMFR</b>           | Day 1 to Day 30    | 524 | 7.9                | 6.8–9.1       | 179 | 9.7             | 7.5–12.6      |
|            |                       | Day 1 to Month 7   | 425 | 8.6                | 7.4–10.0      | 149 | 8.7             | 6.7–11.3      |
|            |                       | Month 6 to Month 7 | 444 | 2.0                | 1.8–2.2       | 150 | 1.5             | 1.3–1.7       |
|            |                       | Day 1 to Day 30    | 524 | 59.4%<br>(311/524) | 55.0–63.6     | 179 | 61.5% (110/179) | 53.9–68.6     |
|            |                       | Day 1 to Month 7   | 425 | 61.9%<br>(263/425) | 57.1–66.5     | 149 | 62.4% (93/149)  | 54.1–70.2     |
| <b>18C</b> | <b>GMT</b>            | Month 6 to Month 7 | 444 | 18.2% (81/444)     | 14.8–22.2     | 150 | 8.7% (13/150)   | 4.7–14.4      |
|            |                       | Day 1              | 586 | 192.0              | 170.8–215.8   | 195 | 175.2           | 144.1–213.0   |
|            |                       | Day 30             | 549 | 5840.7             | 5322.5–6409.3 | 186 | 3215.0          | 2696.2–3833.6 |
|            |                       | Month 6            | 502 | 2540.0             | 2311.4–2791.3 | 169 | 1596.2          | 1334.8–1908.9 |
|            |                       | Month 7            | 444 | 3225.2             | 2959.6–3514.6 | 152 | 2228.6          | 1910.0–2600.4 |
|            | <b>GMFR</b>           | Day 1 to Day 30    | 527 | 21.6               | 19.0–24.5     | 177 | 13.3            | 10.8–16.5     |
|            |                       | Day 1 to Month 7   | 424 | 11.5               | 10.2–12.9     | 147 | 9.4             | 7.7–11.4      |
|            |                       | Month 6 to Month 7 | 442 | 1.3                | 1.2–1.4       | 151 | 1.4             | 1.3–1.6       |
|            |                       | Day 1 to Day 30    | 527 | 85.0%<br>(448/527) | 81.7–87.9     | 177 | 77.4% (137/177) | 70.5–83.3     |
|            |                       | Day 1 to Month 7   | 424 | 79.5%<br>(337/424) | 75.3–83.2     | 147 | 78.2% (115/147) | 70.7–84.6     |
| <b>19A</b> | <b>GMT</b>            | Month 6 to Month 7 | 442 | 4.8% (21/442)      | 3.0–7.2       | 151 | 13.2% (20/151)  | 8.3–19.7      |
|            |                       | Day 1              | 582 | 388.2              | 341.2–441.6   | 194 | 331.9           | 265.8–414.4   |
|            |                       | Day 30             | 551 | 5508.5             | 5022.7–6041.4 | 186 | 6354.1          | 5340.4–7560.3 |
|            |                       | Month 6            | 502 | 2648.6             | 2417.6–2901.7 | 170 | 2867.0          | 2426.9–3386.9 |
|            |                       | Month 7            | 441 | 4521.1             | 4102.2–4982.8 | 152 | 4852.9          | 4185.2–5627.1 |
|            | <b>GMFR</b>           | Day 1 to Day 30    | 525 | 13.0               | 11.2–15.0     | 176 | 17.3            | 13.6–22.0     |



|                                       |                       |                    |     |                    |               |     |                 |               |
|---------------------------------------|-----------------------|--------------------|-----|--------------------|---------------|-----|-----------------|---------------|
|                                       |                       | Day 1 to Month 7   | 423 | 10.0               | 8.7–11.6      | 145 | 12.9            | 10.1–16.4     |
|                                       |                       | Month 6 to Month 7 | 439 | 1.7                | 1.5–1.8       | 152 | 1.6             | 1.4–1.9       |
|                                       | <b>% ≥4-fold rise</b> | Day 1 to Day 30    | 525 | 73.1%<br>(384/525) | 69.1–76.9     | 176 | 79.5% (140/176) | 72.8–85.2     |
|                                       |                       | Day 1 to Month 7   | 423 | 70.4%<br>(298/423) | 65.9–74.8     | 145 | 77.2% (112/145) | 69.5–83.8     |
|                                       |                       | Month 6 to Month 7 | 439 | 15.5% (68/439)     | 12.2–19.2     | 152 | 15.1% (23/152)  | 9.8–21.8      |
| <b>19F</b>                            | <b>GMT</b>            | Day 1              | 591 | 355.1              | 317.1–397.6   | 195 | 327.9           | 269.4–399.1   |
|                                       |                       | Day 30             | 552 | 3327.9             | 3045.9–3636.1 | 186 | 3328.0          | 2889.5–3833.0 |
|                                       |                       | Month 6            | 502 | 1704.8             | 1557.2–1866.4 | 169 | 1838.2          | 1579.8–2139.0 |
|                                       |                       | Month 7            | 446 | 3343.9             | 3083.9–3626.0 | 152 | 3004.0          | 2592.6–3480.8 |
|                                       | <b>GMFR</b>           | Day 1 to Day 30    | 534 | 7.7                | 6.8–8.7       | 177 | 8.2             | 6.7–9.9       |
|                                       |                       | Day 1 to Month 7   | 431 | 7.5                | 6.6–8.4       | 146 | 7.7             | 6.4–9.4       |
|                                       |                       | Month 6 to Month 7 | 445 | 1.9                | 1.8–2.1       | 151 | 1.6             | 1.4–1.8       |
|                                       | <b>% ≥4-fold rise</b> | Day 1 to Day 30    | 534 | 64.2%<br>(343/534) | 60.0–68.3     | 177 | 69.5% (123/177) | 62.1–76.2     |
|                                       |                       | Day 1 to Month 7   | 431 | 63.1%<br>(272/431) | 58.4–67.7     | 146 | 67.8% (99/146)  | 59.6–75.3     |
|                                       |                       | Month 6 to Month 7 | 445 | 18.9% (84/445)     | 15.3–22.8     | 151 | 11.9% (18/151)  | 7.2–18.2      |
| <b>23F</b>                            | <b>GMT</b>            | Day 1              | 563 | 162.4              | 138.5–190.5   | 183 | 142.0           | 107.6–187.5   |
|                                       |                       | Day 30             | 550 | 4911.5             | 4372.5–5516.8 | 184 | 3731.5          | 3017.3–4614.9 |
|                                       |                       | Month 6            | 502 | 2424.7             | 2145.0–2740.8 | 169 | 1963.5          | 1569.7–2456.0 |
|                                       |                       | Month 7            | 445 | 3022.2             | 2703.2–3378.8 | 152 | 2656.3          | 2138.6–3299.4 |
|                                       | <b>GMFR</b>           | Day 1 to Day 30    | 508 | 22.0               | 18.5–26.0     | 164 | 19.2            | 14.6–25.1     |
|                                       |                       | Day 1 to Month 7   | 411 | 13.6               | 11.5–16.0     | 136 | 12.5            | 9.5–16.5      |
|                                       |                       | Month 6 to Month 7 | 443 | 1.3                | 1.2–1.4       | 151 | 1.4             | 1.2–1.6       |
|                                       | <b>% ≥4-fold rise</b> | Day 1 to Day 30    | 508 | 76.8%<br>(390/508) | 72.9–80.4     | 164 | 78.0% (128/164) | 70.9–84.1     |
|                                       |                       | Day 1 to Month 7   | 411 | 72.7%<br>(299/411) | 68.2–77.0     | 136 | 69.9% (95/136)  | 61.4–77.4     |
|                                       |                       | Month 6 to Month 7 | 443 | 8.6% (38/443)      | 6.1–11.6      | 151 | 10.6% (16/151)  | 6.2–16.6      |
| <b>2 Additional Serotypes in V114</b> |                       |                    |     |                    |               |     |                 |               |
| <b>22F</b>                            | <b>GMT</b>            | Day 1              | 535 | 204.0              | 164.9–252.3   | 182 | 128.8           | 89.5–185.4    |
|                                       |                       | Day 30             | 543 | 4498.2             | 4049.2–4996.9 | 171 | 210.0           | 142.5–309.4   |

|            |                       |                    |     |                    |                     |     |                 |                 |
|------------|-----------------------|--------------------|-----|--------------------|---------------------|-----|-----------------|-----------------|
|            |                       | Month 6            | 496 | 2188.9             | 1981.0–2418.7       | 151 | 283.3           | 189.2–424.4     |
|            |                       | Month 7            | 441 | 4000.4             | 3630.3–4408.2       | 151 | 4386.8          | 3426.0–5617.0   |
|            | <b>GMFR</b>           | Day 1 to Day 30    | 480 | 17.8               | 14.2–22.3           | 152 | 1.5             | 1.1–2.1         |
|            |                       | Day 1 to Month 7   | 388 | 15.1               | 12.1–19.0           | 134 | 28.0            | 18.4–42.8       |
|            |                       | Month 6 to Month 7 | 434 | 1.8                | 1.6–2.0             | 133 | 12.1            | 7.7–19.0        |
|            | <b>% ≥4-fold rise</b> | Day 1 to Day 30    | 480 | 63.8%<br>(306/480) | 59.3–68.1           | 152 | 17.8% (27/152)  | 12.0–24.8       |
| <b>22F</b> |                       | Day 1 to Month 7   | 388 | 63.1%<br>(245/388) | 58.1–68.0           | 134 | 72.4% (97/134)  | 64.0–79.8       |
|            |                       | Month 6 to Month 7 | 434 | 19.6% (85/434)     | 16.0–23.6           | 133 | 54.9% (73/133)  | 46.0–63.5       |
| <b>33F</b> | <b>GMT</b>            | Day 1              | 589 | 2086.4             | 1863.4–2336.0       | 197 | 1879.2          | 1503.4–2349.0   |
|            |                       | Day 30             | 550 | 12608.2            | 11452.0–<br>13881.1 | 183 | 1874.0          | 1473.0–2384.3   |
|            |                       | Month 6            | 502 | 6988.8             | 6364.6–7674.1       | 167 | 1962.6          | 1559.7–2469.4   |
|            |                       | Month 7            | 441 | 11884.2            | 10700.2–<br>13199.2 | 151 | 18172.6         | 14759.9–22374.2 |
|            | <b>GMFR</b>           | Day 1 to Day 30    | 530 | 6.0                | 5.3–6.9             | 176 | 1.0             | 0.8–1.2         |
|            |                       | Day 1 to Month 7   | 427 | 5.8                | 5.0–6.6             | 146 | 9.2             | 7.1–11.9        |
|            |                       | Month 6 to Month 7 | 439 | 1.7                | 1.5–1.9             | 148 | 9.1             | 7.3–11.3        |
|            | <b>% ≥4-fold rise</b> | Day 1 to Day 30    | 530 | 56.6%<br>(300/530) | 52.3–60.9           | 176 | 2.3% (4/176)    | 0.6–5.7         |
|            |                       | Day 1 to Month 7   | 427 | 57.1%<br>(244/427) | 52.3–61.9           | 146 | 69.9% (102/146) | 61.7–77.2       |
|            |                       | Month 6 to Month 7 | 439 | 16.2% (71/439)     | 12.9–20.0           | 148 | 70.3% (104/148) | 62.2–77.5       |

N is the number of participants randomized and vaccinated; n is the number of participants contributing to the analysis. Per protocol, Day 1 is pre-vaccination with PCV, Day 30 is 30 days following vaccination with PCV, Month 6 is 6 months following vaccination with PCV and pre-vaccination with PPSV23, and Month 7 is 30 days following vaccination with PPSV23.

CI: confidence interval; GMFR: geometric mean fold-rise; GMT: geometric mean titer (1/dilution); OPA: opsonophagocytic activity; PCV: pneumococcal conjugate vaccine; PCV13: 13-valent pneumococcal conjugate vaccine; PPSV23: 23-valent pneumococcal polysaccharide vaccine; V114: 15-valent pneumococcal conjugate vaccine.

<sup>†</sup>For the continuous endpoints, the within-group 95% CIs are obtained by exponentiating the CIs of the mean of the natural log values based on the t-distribution. For the dichotomous endpoints, the within-group 95% CIs are based on the exact binomial method proposed by Clopper and Pearson.

**Supplemental Table 7. Summary of OPA antibody responses for participants with  $\geq 2$  risk factors**

| Pneumococcal Serotype      | Endpoint                               | Timepoint          | V114<br>N = 228 |                    |                     | PCV13<br>N = 76 |                   |                     |
|----------------------------|----------------------------------------|--------------------|-----------------|--------------------|---------------------|-----------------|-------------------|---------------------|
|                            |                                        |                    | n               | Observed Response  | 95% CI <sup>†</sup> | n               | Observed Response | 95% CI <sup>†</sup> |
| <b>13 Shared Serotypes</b> |                                        |                    |                 |                    |                     |                 |                   |                     |
| <b>1</b>                   | <b>GMT</b>                             | Day 1              | 221             | 7.7                | 6.6–8.9             | 74              | 7.2               | 5.6–9.2             |
|                            |                                        | Day 30             | 201             | 292.0              | 237.5–359.1         | 69              | 304.2             | 214.9–430.5         |
|                            |                                        | Month 6            | 195             | 91.1               | 72.5–114.4          | 63              | 102.4             | 66.8–156.9          |
|                            |                                        | Month 7            | 159             | 284.8              | 235.0–345.1         | 54              | 199.1             | 138.6–286.1         |
|                            | <b>GMFR</b>                            | Day 1 to Day 30    | 198             | 22.5               | 18.1–28.0           | 68              | 25.3              | 18.3–34.9           |
|                            |                                        | Day 1 to Month 7   | 156             | 21.3               | 17.3–26.3           | 53              | 16.1              | 11.3–22.9           |
|                            |                                        | Month 6 to Month 7 | 159             | 2.8                | 2.4–3.4             | 54              | 1.8               | 1.4–2.4             |
|                            | <b>% <math>\geq 4</math>-fold rise</b> | Day 1 to Day 30    | 198             | 83.3%<br>(165/198) | 77.4–88.2           | 68              | 89.7% (61/68)     | 79.9–95.8           |
|                            |                                        | Day 1 to Month 7   | 156             | 89.1%<br>(139/156) | 83.1–93.5           | 53              | 83.0% (44/53)     | 70.2–91.9           |
|                            |                                        | Month 6 to Month 7 | 159             | 38.4% (61/159)     | 30.8–46.4           | 54              | 16.7% (9/54)      | 7.9–29.3            |
| <b>3</b>                   | <b>GMT</b>                             | Day 1              | 221             | 24.9               | 21.0–29.6           | 74              | 20.3              | 15.8–26.1           |
|                            |                                        | Day 30             | 197             | 234.5              | 194.1–283.4         | 69              | 129.2             | 91.1–183.2          |
|                            |                                        | Month 6            | 191             | 108.6              | 90.5–130.3          | 62              | 56.6              | 41.1–78.0           |
|                            |                                        | Month 7            | 158             | 215.3              | 178.9–259.0         | 54              | 174.7             | 123.9–246.3         |
|                            | <b>GMFR</b>                            | Day 1 to Day 30    | 194             | 6.4                | 5.2–7.8             | 68              | 4.4               | 3.4–5.8             |
|                            |                                        | Day 1 to Month 7   | 155             | 6.0                | 5.0–7.3             | 53              | 6.1               | 4.5–8.3             |
|                            |                                        | Month 6 to Month 7 | 155             | 1.9                | 1.7–2.2             | 53              | 2.6               | 2.0–3.4             |
|                            | <b>% <math>\geq 4</math>-fold rise</b> | Day 1 to Day 30    | 194             | 64.9%<br>(126/194) | 57.8–71.6           | 68              | 51.5% (35/68)     | 39.0–63.8           |

|           |             |                       |                  |                    |                    |           |               |                |           |
|-----------|-------------|-----------------------|------------------|--------------------|--------------------|-----------|---------------|----------------|-----------|
|           |             | Day 1 to Month 7      | 155              | 66.5%<br>(103/155) | 58.4–73.8          | 53        | 64.2% (34/53) | 49.8–76.9      |           |
| <b>4</b>  | <b>GMT</b>  | Month 6 to Month 7    | 155              | 16.1% (25/155)     | 10.7–22.9          | 53        | 28.3% (15/53) | 16.8–42.3      |           |
|           |             | Day 1                 | 219              | 49.8               | 40.8–60.7          | 74        | 59.0          | 41.1–84.9      |           |
|           |             | Day 30                | 201              | 1487.6             | 1239.0–1786.0      | 69        | 2449.2        | 1845.4–3250.5  |           |
|           |             | Month 6               | 194              | 595.1              | 484.2–731.3        | 63        | 1147.4        | 826.8–1592.4   |           |
|           |             | Month 7               | 160              | 1619.3             | 1348.6–1944.4      | 54        | 1739.6        | 1261.0–2399.8  |           |
|           | <b>GMFR</b> | Day 1 to Day 30       | 196              | 20.4               | 16.2–25.8          | 68        | 31.9          | 21.4–47.7      |           |
|           |             | Day 1 to Month 7      | 156              | 21.0               | 16.4–26.9          | 53        | 23.2          | 15.1–35.6      |           |
|           |             | Month 6 to Month 7    | 159              | 2.5                | 2.1–3.0            | 54        | 1.5           | 1.2–1.8        |           |
|           |             | <b>% ≥4-fold rise</b> | Day 1 to Day 30  | 196                | 81.1%<br>(159/196) | 74.9–86.3 | 68            | 85.3% (58/68)  | 74.6–92.7 |
|           |             |                       | Day 1 to Month 7 | 156                | 84.6%<br>(132/156) | 78.0–89.9 | 53            | 81.1% (43/53)  | 68.0–90.6 |
| <b>5</b>  | <b>GMT</b>  | Month 6 to Month 7    | 159              | 30.8% (49/159)     | 23.7–38.6          | 54        | 7.4% (4/54)   | 2.1–17.9       |           |
|           |             | Day 1                 | 221              | 17.5               | 15.8–19.3          | 74        | 17.5          | 14.6–21.1      |           |
|           |             | Day 30                | 201              | 582.2              | 469.5–722.0        | 69        | 583.6         | 382.9–889.5    |           |
|           |             | Month 6               | 195              | 224.9              | 177.4–285.1        | 63        | 183.9         | 119.2–283.8    |           |
|           |             | Month 7               | 160              | 523.9              | 418.9–655.1        | 54        | 429.9         | 281.8–655.9    |           |
|           | <b>GMFR</b> | Day 1 to Day 30       | 198              | 19.7               | 16.1–24.1          | 68        | 19.0          | 13.0–27.8      |           |
|           |             | Day 1 to Month 7      | 157              | 17.6               | 14.4–21.6          | 53        | 14.2          | 9.8–20.6       |           |
|           |             | Month 6 to Month 7    | 160              | 2.2                | 1.9–2.6            | 54        | 2.3           | 1.7–3.0        |           |
|           |             | <b>% ≥4-fold rise</b> | Day 1 to Day 30  | 198                | 85.9%<br>(170/198) | 80.2–90.4 | 68            | 82.4% (56/68)  | 71.2–90.5 |
|           |             |                       | Day 1 to Month 7 | 157                | 85.4%<br>(134/157) | 78.8–90.5 | 53            | 86.8% (46/53)  | 74.7–94.5 |
| <b>6A</b> | <b>GMT</b>  | Month 6 to Month 7    | 160              | 23.8% (38/160)     | 17.4–31.1          | 54        | 31.5% (17/54) | 19.5–45.6      |           |
|           |             | Day 1                 | 200              | 457.7              | 381.9–548.5        | 70        | 388.2         | 286.1–526.7    |           |
|           |             | Day 30                | 199              | 11924.9            | 9847.1–14441.2     | 67        | 9968.8        | 6971.9–14254.0 |           |
|           |             | Month 6               | 190              | 4999.5             | 4079.1–6127.6      | 62        | 4533.4        | 3358.5–6119.3  |           |
|           |             | Month 7               | 159              | 4430.9             | 3606.4–5444.0      | 52        | 5792.7        | 4126.9–8131.0  |           |

|           |                       |                    |     |                |                |    |               |                |
|-----------|-----------------------|--------------------|-----|----------------|----------------|----|---------------|----------------|
|           | <b>GMFR</b>           | Day 1 to Day 30    | 178 | 20.9           | 16.7–26.3      | 62 | 19.6          | 12.8–30.0      |
|           |                       | Day 1 to Month 7   | 143 | 7.6            | 6.0–9.7        | 48 | 10.8          | 7.2–16.4       |
|           |                       | Month 6 to Month 7 | 156 | 0.9            | 0.8–1.0        | 51 | 1.1           | 0.9–1.4        |
|           | <b>% ≥4-fold rise</b> | Day 1 to Day 30    | 178 | 89.3%          | 83.8–93.4      | 62 | 80.6% (50/62) | 68.6–89.6      |
|           |                       |                    |     | (159/178)      |                |    |               |                |
|           |                       | Day 1 to Month 7   | 143 | 67.1% (96/143) | 58.8–74.8      | 48 | 75.0% (36/48) | 60.4–86.4      |
|           |                       | Month 6 to Month 7 | 156 | 1.9% (3/156)   | 0.4–5.5        | 51 | 11.8% (6/51)  | 4.4–23.9       |
| <b>6B</b> | <b>GMT</b>            | Day 1              | 209 | 247.4          | 189.8–322.6    | 73 | 291.3         | 187.4–452.8    |
|           |                       | Day 30             | 201 | 9053.1         | 7673.5–10680.9 | 69 | 5545.2        | 4001.0–7685.3  |
|           |                       | Month 6            | 195 | 4101.6         | 3457.8–4865.3  | 63 | 3072.9        | 2222.8–4248.1  |
|           |                       | Month 7            | 160 | 4563.4         | 3848.2–5411.6  | 54 | 4300.2        | 3184.3–5807.1  |
|           | <b>GMFR</b>           | Day 1 to Day 30    | 186 | 29.4           | 21.9–39.3      | 67 | 17.8          | 11.4–27.8      |
|           |                       | Day 1 to Month 7   | 148 | 14.2           | 10.4–19.4      | 52 | 12.9          | 8.0–20.8       |
|           |                       | Month 6 to Month 7 | 160 | 1.1            | 1.0–1.3        | 54 | 1.2           | 0.9–1.4        |
|           | <b>% ≥4-fold rise</b> | Day 1 to Day 30    | 186 | 82.8%          | 76.6–87.9      | 67 | 77.6% (52/67) | 65.8–86.9      |
|           |                       |                    |     | (154/186)      |                |    |               |                |
|           |                       | Day 1 to Month 7   | 148 | 70.3%          | 62.2–77.5      | 52 | 71.2% (37/52) | 56.9–82.9      |
|           |                       |                    |     | (104/148)      |                |    |               |                |
|           |                       | Month 6 to Month 7 | 160 | 5.6% (9/160)   | 2.6–10.4       | 54 | 3.7% (2/54)   | 0.5–12.7       |
| <b>7F</b> | <b>GMT</b>            | Day 1              | 208 | 632.1          | 498.8–801.0    | 69 | 719.3         | 463.4–1116.4   |
|           |                       | Day 30             | 201 | 6399.7         | 5561.5–7364.1  | 69 | 7622.9        | 5546.4–10476.9 |
|           |                       | Month 6            | 194 | 3167.2         | 2772.5–3617.9  | 63 | 3902.8        | 3005.6–5067.7  |
|           |                       | Month 7            | 160 | 6406.9         | 5513.3–7445.3  | 54 | 6333.1        | 4741.2–8459.6  |
|           | <b>GMFR</b>           | Day 1 to Day 30    | 191 | 8.4            | 6.6–10.7       | 63 | 9.4           | 6.3–14.1       |
|           |                       | Day 1 to Month 7   | 149 | 9.2            | 7.0–11.9       | 50 | 6.9           | 4.5–10.6       |
|           |                       | Month 6 to Month 7 | 159 | 2.0            | 1.8–2.3        | 54 | 1.5           | 1.2–1.7        |
|           | <b>% ≥4-fold rise</b> | Day 1 to Day 30    | 191 | 60.2%          | 52.9–67.2      | 63 | 68.3% (43/63) | 55.3–79.4      |
|           |                       |                    |     | (115/191)      |                |    |               |                |
|           |                       | Day 1 to Month 7   | 149 | 62.4% (93/149) | 54.1–70.2      | 50 | 56.0% (28/50) | 41.3–70.0      |
|           |                       | Month 6 to Month 7 | 159 | 20.1% (32/159) | 14.2–27.2      | 54 | 5.6% (3/54)   | 1.2–15.4       |
| <b>9V</b> | <b>GMT</b>            | Day 1              | 218 | 453.7          | 379.1–543.0    | 73 | 687.8         | 497.8–950.2    |

|            |                       |                    |     |                    |               |    |               |               |
|------------|-----------------------|--------------------|-----|--------------------|---------------|----|---------------|---------------|
|            |                       | Day 30             | 199 | 3563.8             | 3069.6–4137.5 | 69 | 3663.4        | 2859.4–4693.4 |
|            |                       | Month 6            | 193 | 1762.8             | 1498.0–2074.5 | 62 | 1899.2        | 1393.3–2588.8 |
|            |                       | Month 7            | 160 | 2706.8             | 2270.2–3227.4 | 54 | 2934.6        | 2244.7–3836.5 |
|            | <b>GMFR</b>           | Day 1 to Day 30    | 193 | 6.4                | 5.4–7.6       | 67 | 5.0           | 3.7–6.6       |
|            |                       | Day 1 to Month 7   | 156 | 5.2                | 4.3–6.3       | 52 | 3.8           | 2.8–5.3       |
|            |                       | Month 6 to Month 7 | 158 | 1.6                | 1.4–1.8       | 53 | 1.4           | 1.1–1.9       |
|            | <b>% ≥4-fold rise</b> | Day 1 to Day 30    | 193 | 58.5%<br>(113/193) | 51.3–65.6     | 67 | 52.2% (35/67) | 39.7–64.6     |
|            |                       | Day 1 to Month 7   | 156 | 55.1% (86/156)     | 47.0–63.1     | 52 | 48.1% (25/52) | 34.0–62.4     |
|            |                       | Month 6 to Month 7 | 158 | 10.1% (16/158)     | 5.9–15.9      | 53 | 7.5% (4/53)   | 2.1–18.2      |
| <b>14</b>  | <b>GMT</b>            | Day 1              | 218 | 431.2              | 340.1–546.6   | 72 | 628.4         | 421.4–936.9   |
|            |                       | Day 30             | 201 | 4326.5             | 3625.3–5163.3 | 69 | 5669.1        | 4281.5–7506.4 |
|            |                       | Month 6            | 195 | 2661.3             | 2261.4–3131.9 | 63 | 3443.9        | 2561.8–4629.8 |
|            |                       | Month 7            | 160 | 4511.8             | 3846.2–5292.6 | 54 | 4829.6        | 3481.6–6699.5 |
|            | <b>GMFR</b>           | Day 1 to Day 30    | 195 | 8.3                | 6.5–10.6      | 66 | 7.8           | 5.2–11.8      |
|            |                       | Day 1 to Month 7   | 156 | 9.3                | 7.2–11.8      | 51 | 6.2           | 3.8–10.1      |
|            |                       | Month 6 to Month 7 | 160 | 1.8                | 1.5–2.0       | 54 | 1.3           | 1.0–1.5       |
|            | <b>% ≥4-fold rise</b> | Day 1 to Day 30    | 195 | 63.1%<br>(123/195) | 55.9–69.9     | 66 | 63.6% (42/66) | 50.9–75.1     |
|            |                       | Day 1 to Month 7   | 156 | 64.7%<br>(101/156) | 56.7–72.2     | 51 | 52.9% (27/51) | 38.5–67.1     |
|            |                       | Month 6 to Month 7 | 160 | 15.6% (25/160)     | 10.4–22.2     | 54 | 3.7% (2/54)   | 0.5–12.7      |
| <b>18C</b> | <b>GMT</b>            | Day 1              | 210 | 185.4              | 152.7–225.1   | 72 | 149.9         | 108.5–207.1   |
|            |                       | Day 30             | 199 | 5836.2             | 4976.9–6843.9 | 69 | 2588.9        | 1934.4–3464.8 |
|            |                       | Month 6            | 194 | 2593.3             | 2194.8–3064.2 | 63 | 1058.3        | 804.3–1392.5  |
|            |                       | Month 7            | 160 | 3063.5             | 2614.1–3590.1 | 53 | 1923.3        | 1462.9–2528.7 |
|            | <b>GMFR</b>           | Day 1 to Day 30    | 185 | 20.7               | 16.6–25.9     | 67 | 11.3          | 8.4–15.4      |
|            |                       | Day 1 to Month 7   | 149 | 10.1               | 8.1–12.5      | 51 | 8.6           | 6.2–11.9      |
|            |                       | Month 6 to Month 7 | 159 | 1.3                | 1.1–1.4       | 53 | 1.6           | 1.3–2.0       |
|            | <b>% ≥4-fold rise</b> | Day 1 to Day 30    | 185 | 84.3%<br>(156/185) | 78.3–89.2     | 67 | 79.1% (53/67) | 67.4–88.1     |

|            |             |                       |                  |                    |                    |           |               |               |           |
|------------|-------------|-----------------------|------------------|--------------------|--------------------|-----------|---------------|---------------|-----------|
|            |             | Day 1 to Month 7      | 149              | 73.8%<br>(110/149) | 66.0–80.7          | 51        | 76.5% (39/51) | 62.5–87.2     |           |
| <b>19A</b> | <b>GMT</b>  | Month 6 to Month 7    | 159              | 3.8% (6/159)       | 1.4–8.0            | 53        | 11.3% (6/53)  | 4.3–23.0      |           |
|            |             | Day 1                 | 217              | 325.3              | 261.0–405.4        | 70        | 408.5         | 282.9–589.9   |           |
|            |             | Day 30                | 201              | 5016.7             | 4257.1–5911.9      | 69        | 5287.3        | 4097.2–6823.1 |           |
|            |             | Month 6               | 194              | 2353.2             | 1998.1–2771.3      | 63        | 2687.1        | 2159.2–3344.2 |           |
|            |             | Month 7               | 158              | 4223.0             | 3466.0–5145.3      | 54        | 4251.1        | 3193.8–5658.5 |           |
|            | <b>GMFR</b> | Day 1 to Day 30       | 195              | 13.8               | 10.8–17.5          | 64        | 11.9          | 8.1–17.5      |           |
|            |             | Day 1 to Month 7      | 151              | 11.0               | 8.4–14.4           | 51        | 8.8           | 5.5–13.8      |           |
|            |             | Month 6 to Month 7    | 157              | 1.9                | 1.7–2.2            | 54        | 1.5           | 1.2–1.8       |           |
|            |             | <b>% ≥4-fold rise</b> | Day 1 to Day 30  | 195                | 71.3%<br>(139/195) | 64.4–77.5 | 64            | 76.6% (49/64) | 64.3–86.2 |
|            |             |                       | Day 1 to Month 7 | 151                | 69.5%<br>(105/151) | 61.5–76.8 | 51            | 74.5% (38/51) | 60.4–85.7 |
| <b>19F</b> | <b>GMT</b>  | Month 6 to Month 7    | 157              | 21.7% (34/157)     | 15.5–28.9          | 54        | 9.3% (5/54)   | 3.1–20.3      |           |
|            |             | Day 1                 | 213              | 317.7              | 264.7–381.2        | 72        | 306.7         | 220.0–427.7   |           |
|            |             | Day 30                | 200              | 2954.9             | 2555.6–3416.6      | 69        | 2698.5        | 2119.0–3436.5 |           |
|            |             | Month 6               | 195              | 1532.0             | 1300.0–1805.5      | 63        | 1432.9        | 1075.3–1909.3 |           |
|            |             | Month 7               | 160              | 2753.3             | 2339.8–3239.9      | 53        | 3616.2        | 2886.6–4530.2 |           |
|            | <b>GMFR</b> | Day 1 to Day 30       | 189              | 8.0                | 6.6–9.7            | 66        | 8.0           | 5.8–11.2      |           |
|            |             | Day 1 to Month 7      | 154              | 6.6                | 5.3–8.2            | 50        | 9.3           | 6.3–13.9      |           |
|            |             | Month 6 to Month 7    | 160              | 1.9                | 1.7–2.1            | 53        | 2.0           | 1.6–2.6       |           |
|            |             | <b>% ≥4-fold rise</b> | Day 1 to Day 30  | 189                | 67.2%<br>(127/189) | 60.0–73.8 | 66            | 69.7% (46/66) | 57.1–80.4 |
|            |             |                       | Day 1 to Month 7 | 154                | 61.0% (94/154)     | 52.9–68.8 | 50            | 68.0% (34/50) | 53.3–80.5 |
| <b>23F</b> | <b>GMT</b>  | Month 6 to Month 7    | 160              | 15.0% (24/160)     | 9.9–21.5           | 53        | 17.0% (9/53)  | 8.1–29.8      |           |
|            |             | Day 1                 | 211              | 124.8              | 97.6–159.7         | 71        | 201.8         | 130.9–311.2   |           |
|            |             | Day 30                | 201              | 4428.2             | 3624.7–5409.9      | 69        | 3236.3        | 2189.5–4783.6 |           |
|            |             | Month 6               | 195              | 2163.7             | 1768.6–2646.9      | 63        | 2094.7        | 1432.8–3062.3 |           |
|            | <b>GMFR</b> | Month 7               | 156              | 2677.4             | 2229.1–3215.7      | 54        | 2554.7        | 1761.1–3705.9 |           |
|            |             | Day 1 to Day 30       | 188              | 23.5               | 18.0–30.8          | 65        | 13.7          | 8.5–22.0      |           |

|                                       |                       |                    |     |                    |                |    |               |                |
|---------------------------------------|-----------------------|--------------------|-----|--------------------|----------------|----|---------------|----------------|
|                                       |                       | Day 1 to Month 7   | 144 | 13.6               | 10.3–18.1      | 51 | 9.2           | 5.5–15.2       |
|                                       |                       | Month 6 to Month 7 | 156 | 1.1                | 1.0–1.3        | 54 | 1.2           | 0.8–1.7        |
|                                       | <b>% ≥4-fold rise</b> | Day 1 to Day 30    | 188 | 77.1%<br>(145/188) | 70.5–82.9      | 65 | 67.7% (44/65) | 54.9–78.8      |
|                                       |                       | Day 1 to Month 7   | 144 | 70.8%<br>(102/144) | 62.7–78.1      | 51 | 64.7% (33/51) | 50.1–77.6      |
|                                       |                       | Month 6 to Month 7 | 156 | 7.7% (12/156)      | 4.0–13.1       | 54 | 7.4% (4/54)   | 2.1–17.9       |
| <b>2 Additional Serotypes in V114</b> |                       |                    |     |                    |                |    |               |                |
| <b>22F</b>                            | <b>GMT</b>            | Day 1              | 199 | 226.3              | 161.0–318.3    | 72 | 211.0         | 111.7–398.5    |
|                                       |                       | Day 30             | 197 | 3645.7             | 3069.2–4330.5  | 65 | 305.0         | 160.2–580.9    |
|                                       |                       | Month 6            | 192 | 1696.2             | 1411.0–2039.2  | 58 | 295.2         | 146.7–594.0    |
|                                       |                       | Month 7            | 160 | 3108.8             | 2669.8–3619.9  | 53 | 3707.4        | 2218.8–6194.6  |
|                                       | <b>GMFR</b>           | Day 1 to Day 30    | 173 | 12.1               | 8.4–17.4       | 62 | 1.2           | 0.7–1.8        |
|                                       |                       | Day 1 to Month 7   | 145 | 10.6               | 7.5–15.0       | 51 | 15.3          | 7.7–30.5       |
|                                       |                       | Month 6 to Month 7 | 157 | 1.9                | 1.6–2.3        | 50 | 11.5          | 5.8–22.9       |
|                                       | <b>% ≥4-fold rise</b> | Day 1 to Day 30    | 173 | 58.4%<br>(101/173) | 50.7–65.8      | 62 | 14.5% (9/62)  | 6.9–25.8       |
|                                       |                       | Day 1 to Month 7   | 145 | 60.0% (87/145)     | 51.5–68.0      | 51 | 66.7% (34/51) | 52.1–79.2      |
|                                       |                       | Month 6 to Month 7 | 157 | 17.8% (28/157)     | 12.2–24.7      | 50 | 54.0% (27/50) | 39.3–68.2      |
| <b>33F</b>                            | <b>GMT</b>            | Day 1              | 215 | 1630.6             | 1320.3–2013.9  | 72 | 2544.0        | 1816.2–3563.4  |
|                                       |                       | Day 30             | 201 | 9240.5             | 7778.9–10976.8 | 67 | 1854.6        | 1165.9–2949.9  |
|                                       |                       | Month 6            | 194 | 5632.0             | 4766.5–6654.8  | 63 | 2022.1        | 1375.3–2973.0  |
|                                       |                       | Month 7            | 160 | 7708.6             | 6353.6–9352.5  | 54 | 14364.8       | 9477.2–21773.1 |
|                                       | <b>GMFR</b>           | Day 1 to Day 30    | 192 | 5.7                | 4.5–7.1        | 64 | 0.8           | 0.5–1.2        |
|                                       |                       | Day 1 to Month 7   | 152 | 4.5                | 3.5–5.7        | 52 | 5.9           | 3.9–9.0        |
|                                       |                       | Month 6 to Month 7 | 159 | 1.4                | 1.2–1.6        | 54 | 6.0           | 4.4–8.4        |
|                                       | <b>% ≥4-fold rise</b> | Day 1 to Day 30    | 192 | 55.2%<br>(106/192) | 47.9–62.4      | 64 | 4.7% (3/64)   | 1.0–13.1       |
|                                       |                       | Day 1 to Month 7   | 152 | 48.7% (74/152)     | 40.5–56.9      | 52 | 59.6% (31/52) | 45.1–73.0      |
|                                       |                       | Month 6 to Month 7 | 159 | 11.3% (18/159)     | 6.8–17.3       | 54 | 66.7% (36/54) | 52.5–78.9      |



---

N is the number of participants randomized and vaccinated; n is the number of participants contributing to the analysis. Per protocol, Day 1 is pre-vaccination with PCV, Day 30 is 30 days following vaccination with PCV, Month 6 is 6 months following vaccination with PCV and pre-vaccination with PPSV23, and Month 7 is 30 days following vaccination with PPSV23.

CI: confidence interval; GMFR: geometric mean fold-rise; GMT: geometric mean titer (1/dilution); OPA: opsonophagocytic activity; PCV: pneumococcal conjugate vaccine; PCV13: 13-valent pneumococcal conjugate vaccine; PPSV23: 23-valent pneumococcal polysaccharide vaccine; V114: 15-valent pneumococcal conjugate vaccine.

†For the continuous endpoints, the within-group 95% CIs are obtained by exponentiating the CIs of the mean of the natural log values based on the t-distribution. For the dichotomous endpoints, the within-group 95% CIs are based on the exact binomial method proposed by Clopper and Pearson.

**Supplemental Table 8. Summary of OPA GMTs for participants with only chronic heart disease**

| Pneumococcal Serotype | Timepoint | V114<br>N = 57 |              |                     | PCV13<br>N = 20 |              |                     |
|-----------------------|-----------|----------------|--------------|---------------------|-----------------|--------------|---------------------|
|                       |           | n              | Observed GMT | 95% CI <sup>†</sup> | n               | Observed GMT | 95% CI <sup>†</sup> |
| <b>1</b>              | Day 1     | 51             | 10.5         | 7.2–15.2            | 18              | 6.9          | 4.3–11.1            |
|                       | Day 30    | 47             | 389.6        | 253.0–600.0         | 17              | 258.1        | 110.8–600.9         |
|                       | Month 6   | 40             | 113.0        | 71.9–177.5          | 16              | 115.5        | 51.9–256.9          |
|                       | Month 7   | 30             | 261.1        | 171.3–398.1         | 11              | 133.7        | 43.2–414.1          |
| <b>3</b>              | Day 1     | 51             | 21.5         | 14.5–31.8           | 18              | 18.2         | 11.1–30.0           |
|                       | Day 30    | 47             | 229.7        | 161.1–327.6         | 17              | 113.6        | 67.4–191.4          |
|                       | Month 6   | 40             | 129.5        | 83.9–199.9          | 15              | 73.2         | 35.8–149.7          |
|                       | Month 7   | 30             | 305.7        | 188.3–496.1         | 10              | 180.4        | 77.0–422.7          |
| <b>4</b>              | Day 1     | 50             | 80.5         | 51.7–125.4          | 17              | 43.2         | 18.3–102.0          |
|                       | Day 30    | 47             | 1849.0       | 1308.8–2612.0       | 16              | 1887.3       | 1211.2–2940.9       |
|                       | Month 6   | 40             | 803.9        | 522.4–1237.1        | 16              | 728.8        | 330.5–1607.2        |
|                       | Month 7   | 30             | 2189.4       | 1623.7–2952.1       | 11              | 1369.5       | 790.7–2372.1        |
| <b>5</b>              | Day 1     | 51             | 19.2         | 15.4–24.0           | 18              | 17.7         | 12.9–24.4           |
|                       | Day 30    | 47             | 798.4        | 551.7–1155.4        | 17              | 754.1        | 309.9–1834.6        |

---

|           |         |    |          |                 |    |          |                 |
|-----------|---------|----|----------|-----------------|----|----------|-----------------|
|           | Month 6 | 40 | 212.5    | 133.1–339.3     | 16 | 409.4    | 174.5–960.7     |
|           | Month 7 | 30 | 718.6    | 495.1–1043.0    | 11 | 605.4    | 189.2–1936.8    |
| <b>6A</b> | Day 1   | 48 | 390.5    | 269.2–566.5     | 17 | 404.8    | 180.1–910.1     |
|           | Day 30  | 47 | 10,708.5 | 7243.9–15,830.1 | 17 | 10,054.1 | 3918.8–25,794.7 |
|           | Month 6 | 40 | 5123.2   | 3467.1–7570.3   | 16 | 6621.1   | 3140.9–13,957.5 |
|           | Month 7 | 29 | 5624.8   | 3926.3–8058.1   | 10 | 6001.9   | 2063.0–17,461.3 |
| <b>6B</b> | Day 1   | 49 | 376.4    | 218.6–648.1     | 18 | 225.5    | 78.1–651.6      |
|           | Day 30  | 47 | 8246.0   | 5659.2–12,015.2 | 17 | 5772.3   | 2840.9–11,728.5 |
|           | Month 6 | 40 | 4286.6   | 2966.7–6193.6   | 15 | 3341.3   | 1434.2–7784.3   |
|           | Month 7 | 30 | 5108.0   | 3820.5–6829.4   | 11 | 3883.5   | 1974.6–7638.0   |
| <b>7F</b> | Day 1   | 49 | 839.7    | 589.9–1195.2    | 18 | 462.3    | 184.4–1159.0    |
|           | Day 30  | 47 | 5514.2   | 3985.6–7628.9   | 17 | 8025.2   | 4473.2–14,397.6 |
|           | Month 6 | 40 | 3165.7   | 2444.3–4099.9   | 16 | 3875.0   | 2324.9–6458.8   |
|           | Month 7 | 30 | 4543.4   | 3380.5–6106.3   | 11 | 4662.8   | 2788.2–7797.8   |
| <b>9V</b> | Day 1   | 50 | 339.8    | 232.6–496.2     | 17 | 276.2    | 128.1–595.9     |
|           | Day 30  | 47 | 3285.6   | 2191.7–4925.6   | 17 | 2850.7   | 1502.6–5408.5   |
|           | Month 6 | 40 | 1479.7   | 1005.0–2178.8   | 16 | 1797.8   | 855.3–3778.6    |
|           | Month 7 | 30 | 2504.6   | 1659.5–3780.2   | 11 | 2505.6   | 986.5–6364.1    |
| <b>14</b> | Day 1   | 50 | 823.8    | 537.9–1261.7    | 18 | 222.9    | 90.8–547.5      |

---

---

|            |         |    |        |                 |    |        |                 |
|------------|---------|----|--------|-----------------|----|--------|-----------------|
|            | Day 30  | 47 | 5889.1 | 4161.1–8334.6   | 17 | 4046.8 | 1893.6–8648.6   |
|            | Month 6 | 40 | 3297.3 | 2208.1–4924.0   | 16 | 3029.1 | 1188.0–7723.6   |
|            | Month 7 | 30 | 7112.2 | 4991.4–10,134.0 | 11 | 4161.4 | 1662.1–10,419.0 |
| <b>18C</b> | Day 1   | 51 | 155.9  | 108.3–224.4     | 18 | 128.5  | 71.8–230.0      |
|            | Day 30  | 47 | 6180.1 | 4370.5–8739.0   | 17 | 2069.4 | 833.2–5139.7    |
|            | Month 6 | 40 | 2146.2 | 1432.9–3214.7   | 16 | 1073.4 | 451.0–2554.8    |
|            | Month 7 | 30 | 2540.9 | 1638.7–3939.7   | 11 | 994.7  | 479.1–2065.1    |
| <b>19A</b> | Day 1   | 51 | 287.8  | 178.1–465.0     | 18 | 327.5  | 150.8–711.4     |
|            | Day 30  | 47 | 4827.4 | 3316.4–7026.8   | 17 | 4398.5 | 2174.6–8896.6   |
|            | Month 6 | 40 | 1986.4 | 1363.8–2893.0   | 16 | 2193.0 | 1159.7–4147.2   |
|            | Month 7 | 29 | 3045.1 | 2173.9–4265.4   | 11 | 3076.4 | 1421.4–6658.4   |
| <b>19F</b> | Day 1   | 49 | 355.5  | 236.7–533.9     | 18 | 343.7  | 197.4–598.5     |
|            | Day 30  | 47 | 2745.5 | 1976.5–3813.6   | 17 | 2276.3 | 1509.8–3431.7   |
|            | Month 6 | 40 | 1356.3 | 939.4–1958.1    | 16 | 980.4  | 475.5–2021.3    |
|            | Month 7 | 30 | 2609.8 | 1956.6–3481.2   | 11 | 1600.3 | 791.5–3235.3    |
| <b>23F</b> | Day 1   | 49 | 137.8  | 79.5–238.7      | 17 | 164.2  | 52.0–517.8      |
|            | Day 30  | 47 | 4337.7 | 2657.0–7081.5   | 17 | 2269.0 | 1065.6–4831.4   |
|            | Month 6 | 40 | 2722.6 | 1636.7–4528.8   | 16 | 1205.8 | 345.0–4213.9    |
|            | Month 7 | 30 | 3178.8 | 2043.2–4945.6   | 11 | 1397.2 | 486.9–4009.6    |

---

## 2 Additional Serotypes in V114

|            |         |    |          |                 |    |          |                 |
|------------|---------|----|----------|-----------------|----|----------|-----------------|
| <b>22F</b> | Day 1   | 46 | 190.9    | 88.8–410.3      | 18 | 137.8    | 40.2–472.4      |
|            | Day 30  | 46 | 6758.8   | 4831.0–9455.9   | 17 | 185.9    | 42.5–812.7      |
|            | Month 6 | 40 | 3201.9   | 2300.1–4457.2   | 14 | 129.1    | 28.2–590.2      |
|            | Month 7 | 30 | 5356.1   | 3502.2–8191.3   | 11 | 1446.3   | 721.7–2898.4    |
| <b>33F</b> | Day 1   | 49 | 1736.6   | 1065.9–2829.5   | 18 | 1268.1   | 574.2–2800.3    |
|            | Day 30  | 47 | 11,697.0 | 8503.2–16,090.3 | 17 | 1741.2   | 883.5–3431.4    |
|            | Month 6 | 40 | 6250.1   | 4435.3–8807.6   | 16 | 918.9    | 399.5–2113.6    |
|            | Month 7 | 30 | 8571.5   | 6411.2–11,459.8 | 11 | 14,956.9 | 6864.3–32,590.1 |

N is the number of participants randomized and vaccinated; n is the number of participants contributing to the analysis. Per protocol, Day 1 is pre-vaccination with PCV, Day 30 is 30 days following vaccination with PCV, Month 6 is 6 months following vaccination with PCV and pre-vaccination with PPSV23, and Month 7 is 30 days following vaccination with PPSV23.

CI: confidence interval; GMT: geometric mean titer (1/dilution); OPA: opsonophagocytic activity; PCV: pneumococcal conjugate vaccine; PCV13: 13-valent pneumococcal conjugate vaccine; PPSV23: 23-valent pneumococcal polysaccharide vaccine; V114: 15-valent pneumococcal conjugate vaccine.

†The within-group 95% CIs are obtained by exponentiating the CIs of the mean of the natural log values based on the t-distribution.

**Supplemental Table 9. Summary of OPA GMTs for participants with only chronic liver disease or only alcohol consumption**

| <b>Pneumococcal Serotype</b> | <b>V114<br/>N = 78</b> |          |                     |                           | <b>PCV13<br/>N = 27</b> |                     |                           |
|------------------------------|------------------------|----------|---------------------|---------------------------|-------------------------|---------------------|---------------------------|
| <b>13 Shared Serotypes</b>   | <b>Timepoint</b>       | <b>n</b> | <b>Observed GMT</b> | <b>95% CI<sup>†</sup></b> | <b>n</b>                | <b>Observed GMT</b> | <b>95% CI<sup>†</sup></b> |
| <b>1</b>                     | Day 1                  | 77       | 6.5                 | 5.1–8.4                   | 27                      | 7.3                 | 4.7–11.3                  |
|                              | Day 30                 | 70       | 260.7               | 178.2–381.3               | 22                      | 322.0               | 139.5–743.2               |
|                              | Month 6                | 62       | 80.1                | 50.6–126.7                | 24                      | 93.0                | 41.7–207.5                |
|                              | Month 7                | 58       | 203.1               | 129.9–317.5               | 23                      | 220.2               | 110.8–437.9               |
| <b>3</b>                     | Day 1                  | 77       | 21.6                | 16.7–28.1                 | 27                      | 16.0                | 10.8–23.8                 |
|                              | Day 30                 | 69       | 284.1               | 207.7–388.5               | 22                      | 137.4               | 77.3–244.0                |
|                              | Month 6                | 61       | 137.1               | 97.2–193.3                | 25                      | 77.0                | 46.4–127.8                |
|                              | Month 7                | 57       | 258.2               | 185.7–359.0               | 23                      | 242.3               | 147.3–398.6               |
| <b>4</b>                     | Day 1                  | 77       | 39.6                | 28.5–54.8                 | 27                      | 34.3                | 20.6–57.0                 |
|                              | Day 30                 | 70       | 1080.8              | 746.3–1565.1              | 23                      | 2189.3              | 1582.0–3029.6             |
|                              | Month 6                | 62       | 562.7               | 401.5–788.7               | 25                      | 1034.1              | 595.2–1796.6              |
|                              | Month 7                | 58       | 1375.5              | 1061.6–1782.2             | 23                      | 2370.9              | 1853.5–3032.6             |
| <b>5</b>                     | Day 1                  | 78       | 17.9                | 15.0–21.5                 | 27                      | 15.9                | 12.1–20.8                 |
|                              | Day 30                 | 70       | 442.5               | 298.9–655.3               | 23                      | 709.6               | 334.2–1506.8              |

---

|           |         |    |          |                   |    |          |                 |
|-----------|---------|----|----------|-------------------|----|----------|-----------------|
|           | Month 6 | 62 | 156.1    | 110.0–221.6       | 25 | 177.4    | 86.4–364.2      |
|           | Month 7 | 58 | 441.1    | 300.5–647.5       | 23 | 555.3    | 280.3–1100.1    |
| <b>6A</b> | Day 1   | 71 | 373.7    | 276.7–504.7       | 23 | 262.5    | 160.4–429.7     |
|           | Day 30  | 69 | 13,918.7 | 10,248.9–18,902.5 | 22 | 14,787.7 | 8688.2–25,169.5 |
|           | Month 6 | 61 | 5658.3   | 4254.7–7524.9     | 25 | 4730.8   | 2755.8–8121.2   |
|           | Month 7 | 55 | 5234.8   | 3969.8–6902.9     | 23 | 5271.1   | 3100.9–8960.0   |
| <b>6B</b> | Day 1   | 75 | 164.2    | 104.0–259.1       | 26 | 224.0    | 99.8–502.8      |
|           | Day 30  | 70 | 10,026.6 | 7645.7–13,148.8   | 23 | 5571.0   | 2522.5–12,303.6 |
|           | Month 6 | 62 | 4729.2   | 3667.8–6097.6     | 25 | 2744.0   | 1456.5–5169.8   |
|           | Month 7 | 58 | 5421.8   | 4247.7–6920.4     | 23 | 3988.9   | 2351.6–6766.0   |
| <b>7F</b> | Day 1   | 71 | 554.9    | 359.4–856.9       | 26 | 861.7    | 421.0–1763.7    |
|           | Day 30  | 70 | 8055.6   | 6077.4–10,677.8   | 23 | 6678.2   | 4627.8–9637.0   |
|           | Month 6 | 62 | 3479.3   | 2776.7–4359.7     | 25 | 4377.3   | 3349.9–5719.8   |
|           | Month 7 | 58 | 7051.9   | 5402.0–9205.8     | 23 | 6024.2   | 4542.6–7989.2   |
| <b>9V</b> | Day 1   | 78 | 682.3    | 506.0–920.2       | 27 | 731.8    | 417.6–1282.6    |
|           | Day 30  | 70 | 3817.9   | 3032.6–4806.6     | 23 | 5095.9   | 3708.1–7003.2   |
|           | Month 6 | 62 | 2175.4   | 1731.5–2733.1     | 25 | 2868.3   | 1837.7–4477.0   |
|           | Month 7 | 58 | 3758.1   | 3008.4–4694.6     | 23 | 3547.0   | 2572.9–4889.8   |
| <b>14</b> | Day 1   | 75 | 558.5    | 378.0–825.4       | 27 | 562.1    | 288.1–1096.8    |

---

---

|            |         |    |        |                 |    |        |                 |
|------------|---------|----|--------|-----------------|----|--------|-----------------|
|            | Day 30  | 70 | 7545.9 | 5276.3–10,791.7 | 23 | 5569.6 | 3409.0–9099.6   |
|            | Month 6 | 62 | 3505.3 | 2519.7–4876.4   | 25 | 3923.3 | 2426.6–6343.3   |
|            | Month 7 | 58 | 6966.5 | 5213.6–9308.8   | 23 | 5902.6 | 3910.1–8910.5   |
| <b>18C</b> | Day 1   | 77 | 171.3  | 123.4–237.7     | 25 | 177.5  | 96.4–326.8      |
|            | Day 30  | 70 | 6244.8 | 4964.9–7854.6   | 23 | 2859.1 | 1416.2–5772.4   |
|            | Month 6 | 62 | 2542.2 | 1993.8–3241.5   | 25 | 1464.9 | 883.8–2428.0    |
|            | Month 7 | 57 | 2990.3 | 2433.6–3674.4   | 23 | 2276.8 | 1509.4–3434.2   |
| <b>19A</b> | Day 1   | 74 | 337.7  | 234.7–485.8     | 26 | 256.0  | 129.3–506.6     |
|            | Day 30  | 70 | 5656.2 | 4447.8–7193.1   | 23 | 6194.8 | 3001.1–12,786.8 |
|            | Month 6 | 62 | 3001.5 | 2373.0–3796.4   | 25 | 2714.9 | 1417.7–5199.0   |
|            | Month 7 | 58 | 4690.7 | 3487.0–6309.9   | 23 | 5224.5 | 3139.1–8695.3   |
| <b>19F</b> | Day 1   | 78 | 259.1  | 192.0–349.6     | 26 | 304.6  | 173.9–533.4     |
|            | Day 30  | 70 | 3816.0 | 2977.1–4891.4   | 23 | 3596.7 | 2260.8–5722.2   |
|            | Month 6 | 62 | 1862.0 | 1435.1–2415.9   | 25 | 1820.4 | 1300.8–2547.6   |
|            | Month 7 | 58 | 3262.6 | 2604.6–4086.9   | 23 | 2724.1 | 2066.2–3591.4   |
| <b>23F</b> | Day 1   | 72 | 151.5  | 98.4–233.3      | 26 | 94.0   | 45.7–193.3      |
|            | Day 30  | 70 | 5467.9 | 3848.3–7769.0   | 22 | 3253.9 | 1486.1–7124.5   |
|            | Month 6 | 62 | 3137.9 | 2273.5–4331.0   | 25 | 1759.4 | 953.4–3246.8    |
|            | Month 7 | 58 | 4001.4 | 2828.8–5660.2   | 23 | 2247.6 | 1258.3–4014.6   |

---



## 2 Additional Serotypes in V114

|            |         |    |          |                 |    |          |                 |
|------------|---------|----|----------|-----------------|----|----------|-----------------|
| <b>22F</b> | Day 1   | 75 | 289.2    | 168.1–497.5     | 27 | 190.5    | 73.9–491.2      |
|            | Day 30  | 70 | 4097.4   | 2913.8–5761.9   | 21 | 182.9    | 61.9–540.1      |
|            | Month 6 | 62 | 1886.6   | 1344.5–2647.2   | 22 | 530.5    | 201.4–1397.4    |
|            | Month 7 | 56 | 3446.8   | 2741.5–4333.5   | 23 | 2975.3   | 1508.9–5866.5   |
| <b>33F</b> | Day 1   | 75 | 2175.3   | 1595.9–2965.1   | 27 | 1755.6   | 846.7–3640.1    |
|            | Day 30  | 70 | 12,939.5 | 9854.5–16,990.2 | 22 | 2367.7   | 1102.3–5086.1   |
|            | Month 6 | 62 | 7921.2   | 6248.0–10,042.4 | 24 | 2305.6   | 1210.0–4393.1   |
|            | Month 7 | 58 | 11,934.2 | 9108.8–15,636.1 | 23 | 14,618.0 | 8683.4–24,608.6 |

N is the number of participants randomized and vaccinated; n is the number of participants contributing to the analysis. Per protocol, Day 1 is pre-vaccination with PCV, Day 30 is 30 days following vaccination with PCV, Month 6 is 6 months following vaccination with PCV and pre-vaccination with PPSV23, and Month 7 is 30 days following vaccination with PPSV23.

CI: confidence interval; GMT: geometric mean titer (1/dilution); OPA: opsonophagocytic activity; PCV: pneumococcal conjugate vaccine; PCV13: 13-valent pneumococcal conjugate vaccine; PPSV23: 23-valent pneumococcal polysaccharide vaccine; V114: 15-valent pneumococcal conjugate vaccine.

†The within-group 95% CIs are obtained by exponentiating the CIs of the mean of the natural log values based on the t-distribution.

**Supplemental Table 10. Summary of OPA GMTs for participants with only chronic lung disease**

| Pneumococcal Serotype | Timepoint | V114<br>N = 163 |              |                     | PCV13<br>N = 53 |              |                     |
|-----------------------|-----------|-----------------|--------------|---------------------|-----------------|--------------|---------------------|
|                       |           | n               | Observed GMT | 95% CI <sup>†</sup> | n               | Observed GMT | 95% CI <sup>†</sup> |
| <b>1</b>              | Day 1     | 151             | 8.1          | 6.8–9.6             | 50              | 9.6          | 6.7–13.8            |
|                       | Day 30    | 141             | 428.2        | 336.9–544.3         | 48              | 449.2        | 281.6–716.6         |
|                       | Month 6   | 128             | 128.6        | 98.4–168.0          | 44              | 194.8        | 118.4–320.7         |
|                       | Month 7   | 115             | 364.5        | 293.9–452.1         | 41              | 295.9        | 205.8–425.3         |
| <b>3</b>              | Day 1     | 149             | 28.1         | 22.8–34.7           | 49              | 22.0         | 15.9–30.2           |
|                       | Day 30    | 139             | 184.6        | 151.9–224.3         | 48              | 182.3        | 135.8–244.8         |
|                       | Month 6   | 127             | 109.0        | 88.8–133.7          | 43              | 88.3         | 60.4–129.0          |
|                       | Month 7   | 115             | 214.1        | 176.6–259.6         | 41              | 234.9        | 174.9–315.3         |
| <b>4</b>              | Day 1     | 147             | 52.9         | 40.9–68.5           | 49              | 56.7         | 35.0–91.7           |
|                       | Day 30    | 141             | 2282.7       | 1902.2–2739.3       | 48              | 3371.8       | 2533.8–4487.1       |
|                       | Month 6   | 128             | 1065.1       | 886.3–1279.9        | 44              | 1372.8       | 957.8–1967.8        |
|                       | Month 7   | 115             | 2203.2       | 1838.6–2640.0       | 41              | 2097.1       | 1558.6–2821.6       |
| <b>5</b>              | Day 1     | 151             | 18.2         | 15.9–20.8           | 50              | 20.9         | 15.6–27.9           |
|                       | Day 30    | 141             | 740.5        | 586.9–934.4         | 48              | 711.1        | 427.8–1182.0        |

---

|           |         |     |          |                   |    |          |                 |
|-----------|---------|-----|----------|-------------------|----|----------|-----------------|
|           | Month 6 | 127 | 264.5    | 204.3–342.5       | 44 | 368.3    | 211.0–643.0     |
|           | Month 7 | 115 | 742.5    | 608.1–906.7       | 41 | 734.3    | 490.3–1099.7    |
| <b>6A</b> | Day 1   | 145 | 528.4    | 419.4–665.9       | 45 | 325.8    | 221.4–479.5     |
|           | Day 30  | 140 | 16,229.7 | 13,442.7–19,594.4 | 47 | 14,936.1 | 9462.8–23,575.2 |
|           | Month 6 | 123 | 6086.4   | 4923.2–7524.6     | 44 | 5461.7   | 3432.3–8691.0   |
|           | Month 7 | 113 | 6474.4   | 5312.5–7890.4     | 40 | 7014.2   | 4417.1–11,138.3 |
| <b>6B</b> | Day 1   | 149 | 309.9    | 219.5–437.5       | 47 | 145.9    | 81.8–260.2      |
|           | Day 30  | 141 | 12,093.4 | 10,240.9–14,281.0 | 47 | 9165.0   | 5896.2–14,245.9 |
|           | Month 6 | 127 | 5549.3   | 4602.5–6690.9     | 44 | 3577.3   | 2218.8–5767.7   |
|           | Month 7 | 114 | 5729.8   | 4819.1–6812.6     | 41 | 4039.8   | 2851.1–5724.2   |
| <b>7F</b> | Day 1   | 144 | 637.7    | 475.5–855.2       | 48 | 664.5    | 409.5–1078.5    |
|           | Day 30  | 141 | 6038.3   | 5093.5–7158.2     | 47 | 7616.3   | 5577.8–10,399.8 |
|           | Month 6 | 127 | 3151.4   | 2650.0–3747.7     | 44 | 4924.6   | 3572.7–6787.9   |
|           | Month 7 | 115 | 6093.0   | 5149.7–7209.1     | 41 | 5612.3   | 4087.1–7706.7   |
| <b>9V</b> | Day 1   | 151 | 511.9    | 408.1–642.2       | 49 | 426.5    | 274.8–661.9     |
|           | Day 30  | 141 | 3831.4   | 3193.3–4596.9     | 48 | 4632.0   | 3445.6–6227.0   |
|           | Month 6 | 126 | 1743.2   | 1431.1–2123.5     | 43 | 2379.7   | 1628.1–3478.3   |
|           | Month 7 | 114 | 2994.6   | 2445.9–3666.4     | 41 | 3816.5   | 2763.6–5270.6   |
| <b>14</b> | Day 1   | 147 | 571.1    | 432.3–754.4       | 50 | 438.6    | 260.3–739.0     |

---

---

|            |         |     |        |               |    |        |               |
|------------|---------|-----|--------|---------------|----|--------|---------------|
|            | Day 30  | 141 | 5340.9 | 4393.8–6492.1 | 48 | 5342.6 | 3985.5–7161.8 |
|            | Month 6 | 128 | 3096.2 | 2485.4–3857.1 | 43 | 3195.2 | 2177.7–4688.1 |
|            | Month 7 | 114 | 5219.0 | 4300.5–6333.6 | 41 | 4618.8 | 3403.9–6267.3 |
| <b>18C</b> | Day 1   | 147 | 214.4  | 168.2–273.4   | 49 | 210.6  | 139.7–317.5   |
|            | Day 30  | 140 | 6703.7 | 5677.6–7915.2 | 48 | 3286.6 | 2410.6–4480.8 |
|            | Month 6 | 128 | 2777.0 | 2348.2–3284.2 | 44 | 2048.5 | 1485.1–2825.7 |
|            | Month 7 | 114 | 3659.2 | 3138.4–4266.4 | 41 | 2495.3 | 1760.3–3537.1 |
| <b>19A</b> | Day 1   | 146 | 329.8  | 247.4–439.7   | 48 | 295.4  | 190.4–458.3   |
|            | Day 30  | 141 | 5925.1 | 4980.1–7049.5 | 48 | 5654.4 | 4328.9–7385.9 |
|            | Month 6 | 128 | 2786.6 | 2266.9–3425.6 | 44 | 2592.2 | 1987.9–3380.3 |
|            | Month 7 | 114 | 4902.2 | 4101.5–5859.2 | 41 | 5413.3 | 4094.7–7156.5 |
| <b>19F</b> | Day 1   | 149 | 406.4  | 324.7–508.6   | 49 | 353.8  | 240.1–521.2   |
|            | Day 30  | 141 | 3902.3 | 3269.3–4657.9 | 48 | 2987.7 | 2237.9–3988.8 |
|            | Month 6 | 128 | 1795.0 | 1496.5–2152.9 | 43 | 2118.3 | 1670.3–2686.5 |
|            | Month 7 | 115 | 3786.1 | 3232.2–4434.9 | 41 | 3186.5 | 2334.6–4349.3 |
| <b>23F</b> | Day 1   | 144 | 206.3  | 148.2–287.3   | 46 | 156.8  | 88.0–279.5    |
|            | Day 30  | 141 | 5910.0 | 4789.3–7292.8 | 48 | 3576.4 | 2292.1–5580.4 |
|            | Month 6 | 128 | 2898.1 | 2259.3–3717.6 | 44 | 2392.3 | 1548.9–3695.0 |
|            | Month 7 | 115 | 3367.4 | 2716.3–4174.5 | 41 | 3101.8 | 1948.9–4936.6 |

---

## 2 Additional Serotypes in V114

|            |         |     |          |                   |    |          |                   |
|------------|---------|-----|----------|-------------------|----|----------|-------------------|
| <b>22F</b> | Day 1   | 135 | 223.4    | 145.6–342.8       | 42 | 105.9    | 48.5–230.9        |
|            | Day 30  | 139 | 5252.6   | 4330.0–6371.7     | 45 | 254.9    | 118.4–548.6       |
|            | Month 6 | 126 | 2436.9   | 2073.6–2864.0     | 41 | 405.9    | 196.6–838.0       |
|            | Month 7 | 114 | 4155.1   | 3509.1–4920.0     | 41 | 7758.2   | 4635.1–12,985.6   |
| <b>33F</b> | Day 1   | 148 | 2209.0   | 1794.0–2720.1     | 48 | 2023.2   | 1326.7–3085.3     |
|            | Day 30  | 141 | 14,560.8 | 11,880.2–17,846.4 | 48 | 2260.3   | 1442.8–3540.8     |
|            | Month 6 | 128 | 7982.3   | 6528.4–9759.9     | 42 | 2428.9   | 1471.6–4009.0     |
|            | Month 7 | 113 | 11,947.4 | 9882.3–14,444.1   | 41 | 24,161.7 | 16,008.5–36,467.4 |

N is the number of participants randomized and vaccinated; n is the number of participants contributing to the analysis. Per protocol, Day 1 is pre-vaccination with PCV, Day 30 is 30 days following vaccination with PCV, Month 6 is 6 months following vaccination with PCV and pre-vaccination with PPSV23, and Month 7 is 30 days following vaccination with PPSV23.

CI: confidence interval; GMT: geometric mean titer (1/dilution); OPA: opsonophagocytic activity; PCV: pneumococcal conjugate vaccine; PCV13: 13-valent pneumococcal conjugate vaccine; PPSV23: 23-valent pneumococcal polysaccharide vaccine; V114: 15-valent pneumococcal conjugate vaccine.

†The within-group 95% CIs are obtained by exponentiating the CIs of the mean of the natural log values based on the t-distribution.

**Supplemental Table 11. Summary of OPA GMTs for participants with only diabetes mellitus**

| Pneumococcal Serotype |           | V114<br>N = 157 |              |                     | PCV13<br>N = 51 |              |                     |
|-----------------------|-----------|-----------------|--------------|---------------------|-----------------|--------------|---------------------|
| 13 Shared Serotypes   | Timepoint | n               | Observed GMT | 95% CI <sup>†</sup> | n               | Observed GMT | 95% CI <sup>†</sup> |
| <b>1</b>              | Day 1     | 154             | 8.3          | 6.9–9.9             | 49              | 10.2         | 7.2–14.3            |
|                       | Day 30    | 142             | 317.6        | 242.3–416.1         | 48              | 692.2        | 443.9–1079.3        |
|                       | Month 6   | 139             | 115.2        | 89.7–148.1          | 40              | 219.9        | 132.7–364.5         |
|                       | Month 7   | 125             | 328.4        | 263.9–408.6         | 37              | 431.0        | 294.9–629.8         |
| <b>3</b>              | Day 1     | 152             | 21.0         | 17.3–25.4           | 48              | 21.0         | 15.6–28.3           |
|                       | Day 30    | 141             | 233.3        | 199.5–272.8         | 48              | 178.4        | 118.9–267.5         |
|                       | Month 6   | 136             | 113.2        | 94.8–135.2          | 40              | 94.3         | 61.7–144.1          |
|                       | Month 7   | 125             | 224.4        | 189.0–266.3         | 36              | 250.4        | 184.5–340.0         |
| <b>4</b>              | Day 1     | 153             | 57.2         | 44.0–74.4           | 47              | 44.2         | 28.7–68.0           |
|                       | Day 30    | 142             | 1700.4       | 1410.2–2050.3       | 48              | 3091.5       | 2104.9–4540.5       |
|                       | Month 6   | 140             | 766.9        | 618.9–950.2         | 39              | 1201.4       | 748.2–1928.9        |
|                       | Month 7   | 125             | 1991.7       | 1667.3–2379.3       | 38              | 2137.5       | 1483.8–3079.1       |
| <b>5</b>              | Day 1     | 154             | 20.6         | 17.6–24.1           | 49              | 19.9         | 15.4–25.5           |
|                       | Day 30    | 142             | 743.9        | 575.7–961.2         | 48              | 1285.2       | 828.1–1994.5        |

---

|           |         |     |          |                   |    |          |                 |
|-----------|---------|-----|----------|-------------------|----|----------|-----------------|
|           | Month 6 | 140 | 239.0    | 182.0–313.8       | 40 | 560.7    | 337.6–931.3     |
|           | Month 7 | 126 | 772.7    | 618.4–965.4       | 38 | 1095.6   | 744.8–1611.5    |
| <b>6A</b> | Day 1   | 140 | 372.0    | 297.3–465.5       | 43 | 289.8    | 201.1–417.8     |
|           | Day 30  | 141 | 13,098.4 | 10,538.2–16,280.6 | 47 | 12,618.3 | 9266.7–17,182.2 |
|           | Month 6 | 138 | 5698.2   | 4635.8–7003.9     | 38 | 5251.2   | 3667.5–7518.8   |
|           | Month 7 | 125 | 6254.7   | 5103.1–7666.1     | 38 | 6495.0   | 4769.2–8845.2   |
| <b>6B</b> | Day 1   | 153 | 189.7    | 138.0–260.8       | 48 | 188.3    | 110.7–320.4     |
|           | Day 30  | 142 | 9844.8   | 8162.4–11,873.9   | 48 | 7413.4   | 5432.6–10,116.4 |
|           | Month 6 | 140 | 3872.2   | 3101.2–4834.8     | 39 | 3216.5   | 2134.2–4847.8   |
|           | Month 7 | 126 | 4604.1   | 3728.1–5686.0     | 38 | 5194.7   | 3978.2–6783.2   |
| <b>7F</b> | Day 1   | 145 | 421.9    | 313.4–567.9       | 48 | 353.1    | 211.5–589.5     |
|           | Day 30  | 142 | 6283.3   | 5271.8–7488.8     | 48 | 7862.9   | 5645.3–10,951.8 |
|           | Month 6 | 139 | 3015.0   | 2528.0–3595.9     | 40 | 4061.8   | 2892.1–5704.6   |
|           | Month 7 | 125 | 5319.3   | 4578.1–6180.5     | 38 | 5623.0   | 4106.6–7699.4   |
| <b>9V</b> | Day 1   | 147 | 382.8    | 304.9–480.6       | 47 | 495.2    | 341.8–717.6     |
|           | Day 30  | 142 | 3167.6   | 2607.7–3847.7     | 48 | 4354.2   | 3075.7–6164.3   |
|           | Month 6 | 138 | 1699.6   | 1414.8–2041.8     | 40 | 2313.8   | 1551.0–3451.7   |
|           | Month 7 | 125 | 2862.7   | 2378.0–3446.2     | 37 | 3934.8   | 2683.6–5769.2   |
| <b>14</b> | Day 1   | 153 | 467.3    | 352.1–620.1       | 48 | 585.1    | 358.6–954.4     |

---

---

|            |         |     |        |               |    |        |                 |
|------------|---------|-----|--------|---------------|----|--------|-----------------|
|            | Day 30  | 142 | 4243.8 | 3536.7–5092.4 | 48 | 5719.5 | 4360.7–7501.6   |
|            | Month 6 | 140 | 2125.8 | 1754.8–2575.2 | 39 | 3240.4 | 2454.6–4277.7   |
|            | Month 7 | 126 | 4716.3 | 3907.5–5692.4 | 38 | 4774.0 | 3658.8–6229.3   |
| <b>18C</b> | Day 1   | 150 | 169.7  | 135.5–212.4   | 47 | 127.8  | 90.6–180.3      |
|            | Day 30  | 141 | 5544.1 | 4419.1–6955.5 | 48 | 3636.3 | 2587.4–5110.5   |
|            | Month 6 | 139 | 2387.2 | 1945.1–2929.7 | 39 | 1476.9 | 969.7–2249.3    |
|            | Month 7 | 126 | 3096.1 | 2620.7–3657.7 | 38 | 2351.5 | 1763.2–3136.0   |
| <b>19A</b> | Day 1   | 151 | 437.4  | 344.7–554.9   | 47 | 332.8  | 213.0–519.8     |
|            | Day 30  | 142 | 6082.5 | 5058.1–7314.4 | 48 | 9465.3 | 6443.5–13,904.2 |
|            | Month 6 | 140 | 2721.2 | 2311.9–3202.9 | 40 | 3328.9 | 2289.4–4840.3   |
|            | Month 7 | 124 | 4726.4 | 3922.3–5695.4 | 38 | 5790.9 | 4464.7–7511.1   |
| <b>19F</b> | Day 1   | 152 | 332.7  | 263.7–419.6   | 47 | 313.3  | 204.4–480.4     |
|            | Day 30  | 142 | 3214.2 | 2722.3–3794.9 | 48 | 4606.9 | 3359.8–6316.8   |
|            | Month 6 | 140 | 1655.0 | 1391.8–1968.1 | 40 | 2102.8 | 1550.3–2852.3   |
|            | Month 7 | 126 | 3603.6 | 3092.7–4199.0 | 38 | 3800.5 | 2885.7–5005.2   |
| <b>23F</b> | Day 1   | 146 | 126.9  | 93.0–173.1    | 44 | 147.1  | 82.8–261.3      |
|            | Day 30  | 142 | 4739.4 | 3774.4–5951.1 | 47 | 4549.7 | 2899.6–7138.8   |
|            | Month 6 | 139 | 2045.0 | 1637.5–2554.0 | 40 | 1925.5 | 1215.2–3051.0   |
|            | Month 7 | 126 | 2796.2 | 2297.2–3403.5 | 38 | 3327.1 | 2146.2–5157.8   |

---



## 2 Additional Serotypes in V114

|            |         |     |          |                   |    |          |                   |
|------------|---------|-----|----------|-------------------|----|----------|-------------------|
| <b>22F</b> | Day 1   | 138 | 147.7    | 96.8–225.3        | 45 | 122.9    | 57.4–263.2        |
|            | Day 30  | 141 | 4983.3   | 4062.7–6112.7     | 45 | 201.6    | 91.8–442.7        |
|            | Month 6 | 137 | 2355.4   | 1987.4–2791.6     | 34 | 176.8    | 68.4–457.4        |
|            | Month 7 | 126 | 4804.8   | 3990.5–5785.4     | 37 | 4616.1   | 3239.9–6577.0     |
| <b>33F</b> | Day 1   | 153 | 1824.7   | 1424.1–2337.9     | 49 | 2017.4   | 1323.5–3075.2     |
|            | Day 30  | 142 | 13,611.0 | 11,281.0–16,422.3 | 47 | 1679.4   | 1029.8–2738.7     |
|            | Month 6 | 139 | 6567.9   | 5445.4–7921.7     | 40 | 1680.6   | 1003.6–2814.3     |
|            | Month 7 | 125 | 12,669.8 | 9945.6–16,140.2   | 38 | 19,805.3 | 12,557.6–31,235.8 |

N is the number of participants randomized and vaccinated; n is the number of participants contributing to the analysis. Per protocol, Day 1 is pre-vaccination with PCV, Day 30 is 30 days following vaccination with PCV, Month 6 is 6 months following vaccination with PCV and pre-vaccination with PPSV23, and Month 7 is 30 days following vaccination with PPSV23.

CI: confidence interval; GMT: geometric mean titer (1/dilution); OPA: opsonophagocytic activity; PCV: pneumococcal conjugate vaccine; PCV13: 13-valent pneumococcal conjugate vaccine; PPSV23: 23-valent pneumococcal polysaccharide vaccine; V114: 15-valent pneumococcal conjugate vaccine.

†The within-group 95% CIs are obtained by exponentiating the CIs of the mean of the natural log values based on the t-distribution.

**Supplemental Table 12. Summary of OPA GMTs for participants with only tobacco use**

| Pneumococcal Serotype | Timepoint | V114<br>N = 165 |              |                     | PCV13<br>N = 56 |              |                     |
|-----------------------|-----------|-----------------|--------------|---------------------|-----------------|--------------|---------------------|
|                       |           | n               | Observed GMT | 95% CI <sup>†</sup> | n               | Observed GMT | 95% CI <sup>†</sup> |
| <b>1</b>              | Day 1     | 164             | 6.4          | 5.6–7.4             | 56              | 6.6          | 5.1–8.5             |
|                       | Day 30    | 152             | 277.2        | 215.7–356.3         | 50              | 196.6        | 119.8–322.5         |
|                       | Month 6   | 133             | 74.2         | 55.4–99.2           | 45              | 55.9         | 31.5–99.4           |
|                       | Month 7   | 117             | 244.5        | 188.1–317.9         | 38              | 157.8        | 99.2–251.2          |
| <b>3</b>              | Day 1     | 164             | 23.2         | 19.1–28.1           | 55              | 20.4         | 14.7–28.2           |
|                       | Day 30    | 148             | 177.4        | 143.9–218.6         | 49              | 143.6        | 99.0–208.2          |
|                       | Month 6   | 130             | 106.9        | 85.5–133.7          | 44              | 74.6         | 50.0–111.4          |
|                       | Month 7   | 117             | 201.7        | 160.6–253.3         | 39              | 189.0        | 120.5–296.3         |
| <b>4</b>              | Day 1     | 163             | 61.7         | 47.6–79.9           | 56              | 49.2         | 32.7–74.0           |
|                       | Day 30    | 150             | 1224.7       | 990.4–1514.4        | 50              | 2821.6       | 2056.4–3871.6       |
|                       | Month 6   | 133             | 507.4        | 399.9–643.7         | 45              | 923.4        | 621.2–1372.5        |
|                       | Month 7   | 117             | 1345.7       | 1103.2–1641.4       | 39              | 1649.0       | 1287.1–2112.7       |
| <b>5</b>              | Day 1     | 164             | 21.0         | 17.9–24.6           | 56              | 22.2         | 16.4–29.9           |
|                       | Day 30    | 152             | 474.8        | 372.4–605.4         | 50              | 653.2        | 426.1–1001.2        |

---

|           |         |     |          |                 |    |          |                 |
|-----------|---------|-----|----------|-----------------|----|----------|-----------------|
|           | Month 6 | 133 | 206.2    | 159.4–266.8     | 45 | 192.7    | 115.4–321.8     |
|           | Month 7 | 117 | 518.7    | 411.6–653.6     | 39 | 504.4    | 332.8–764.5     |
| <b>6A</b> | Day 1   | 148 | 464.9    | 369.6–584.7     | 53 | 447.0    | 309.8–644.9     |
|           | Day 30  | 147 | 10,086.8 | 8198.1–12,410.6 | 49 | 10,489.0 | 7120.0–15,452.0 |
|           | Month 6 | 131 | 5518.7   | 4515.6–6744.5   | 44 | 3776.8   | 2689.8–5303.2   |
|           | Month 7 | 115 | 5806.3   | 4706.6–7163.1   | 38 | 5098.2   | 3600.5–7218.8   |
| <b>6B</b> | Day 1   | 163 | 269.8    | 197.8–368.1     | 55 | 252.8    | 141.3–452.3     |
|           | Day 30  | 148 | 9535.1   | 8050.3–11,293.8 | 50 | 6069.2   | 4019.7–9163.5   |
|           | Month 6 | 132 | 4874.3   | 4058.1–5854.6   | 45 | 2756.6   | 1711.2–4440.6   |
|           | Month 7 | 117 | 5336.2   | 4509.9–6313.9   | 39 | 3958.7   | 2498.6–6272.1   |
| <b>7F</b> | Day 1   | 150 | 744.6    | 563.8–983.4     | 52 | 425.5    | 254.3–712.1     |
|           | Day 30  | 152 | 4595.9   | 3943.9–5355.8   | 50 | 7552.7   | 5900.6–9667.3   |
|           | Month 6 | 133 | 2872.2   | 2466.4–3344.7   | 45 | 3692.1   | 2779.9–4903.7   |
|           | Month 7 | 117 | 5071.2   | 4243.0–6061.0   | 39 | 6083.6   | 4638.9–7978.2   |
| <b>9V</b> | Day 1   | 162 | 626.4    | 502.6–780.7     | 56 | 514.2    | 362.8–728.7     |
|           | Day 30  | 152 | 3305.5   | 2798.0–3905.0   | 50 | 4131.6   | 3164.4–5394.4   |
|           | Month 6 | 133 | 1971.7   | 1663.4–2337.1   | 45 | 1774.1   | 1320.2–2384.1   |
|           | Month 7 | 117 | 3016.6   | 2522.3–3607.7   | 39 | 3023.6   | 2201.7–4152.4   |
| <b>14</b> | Day 1   | 158 | 538.9    | 415.0–699.7     | 54 | 672.3    | 452.5–998.8     |

---

---

|            |         |     |        |               |    |        |                 |
|------------|---------|-----|--------|---------------|----|--------|-----------------|
|            | Day 30  | 149 | 4692.6 | 3894.0–5655.0 | 50 | 7771.7 | 5515.3–10,951.3 |
|            | Month 6 | 133 | 2634.6 | 2180.4–3183.4 | 45 | 3695.4 | 2445.9–5583.3   |
|            | Month 7 | 117 | 4939.7 | 4199.0–5811.0 | 39 | 5916.3 | 3783.3–9251.8   |
| <b>18C</b> | Day 1   | 161 | 219.7  | 174.3–276.8   | 56 | 213.3  | 142.7–319.0     |
|            | Day 30  | 151 | 5140.4 | 4396.0–6010.8 | 50 | 3428.7 | 2627.6–4474.2   |
|            | Month 6 | 133 | 2615.5 | 2197.0–3113.8 | 45 | 1615.7 | 1215.1–2148.5   |
|            | Month 7 | 117 | 3286.9 | 2752.1–3925.5 | 39 | 2328.4 | 1808.2–2998.4   |
| <b>19A</b> | Day 1   | 160 | 472.1  | 375.7–593.2   | 55 | 416.1  | 268.2–645.7     |
|            | Day 30  | 151 | 4825.1 | 4022.8–5787.4 | 50 | 5558.2 | 4278.2–7221.0   |
|            | Month 6 | 132 | 2520.8 | 2134.5–2977.1 | 45 | 3141.1 | 2405.4–4101.7   |
|            | Month 7 | 116 | 4315.2 | 3535.8–5266.5 | 39 | 3965.1 | 3049.3–5156.0   |
| <b>19F</b> | Day 1   | 163 | 387.7  | 313.1–480.1   | 55 | 324.9  | 216.8–486.9     |
|            | Day 30  | 152 | 2955.4 | 2484.3–3515.8 | 50 | 2965.9 | 2375.4–3703.4   |
|            | Month 6 | 132 | 1720.7 | 1450.3–2041.5 | 45 | 1790.9 | 1278.8–2508.0   |
|            | Month 7 | 117 | 2945.6 | 2498.0–3473.4 | 39 | 2841.0 | 2073.9–3891.8   |
| <b>23F</b> | Day 1   | 152 | 178.9  | 131.9–242.6   | 50 | 148.2  | 87.2–252.0      |
|            | Day 30  | 150 | 4221.6 | 3383.3–5267.7 | 50 | 4057.9 | 2926.6–5626.4   |
|            | Month 6 | 133 | 2089.6 | 1637.9–2665.9 | 44 | 2084.5 | 1479.3–2937.4   |
|            | Month 7 | 116 | 2534.1 | 2017.5–3182.9 | 39 | 2397.3 | 1646.2–3491.2   |

---

## 2 Additional Serotypes in V114

|            |         |     |          |                 |    |          |                 |
|------------|---------|-----|----------|-----------------|----|----------|-----------------|
| <b>22F</b> | Day 1   | 141 | 217.6    | 142.4–332.4     | 50 | 125.2    | 60.4–259.3      |
|            | Day 30  | 147 | 3240.9   | 2650.7–3962.5   | 43 | 200.9    | 90.1–447.9      |
|            | Month 6 | 131 | 1746.7   | 1391.4–2192.6   | 40 | 272.9    | 117.6–633.3     |
|            | Month 7 | 115 | 3140.7   | 2544.1–3877.3   | 39 | 3946.3   | 2264.2–6877.9   |
| <b>33F</b> | Day 1   | 164 | 2327.3   | 1915.6–2827.5   | 55 | 1945.2   | 1227.2–3083.2   |
|            | Day 30  | 150 | 10,360.0 | 8676.1–12,370.9 | 49 | 1600.3   | 945.5–2708.6    |
|            | Month 6 | 133 | 6401.4   | 5411.3–7572.6   | 45 | 2218.9   | 1542.9–3191.1   |
|            | Month 7 | 115 | 11,983.5 | 9884.6–14,528.1 | 38 | 14,800.3 | 9745.7–22,476.5 |

N is the number of participants randomized and vaccinated; n is the number of participants contributing to the analysis. Per protocol, Day 1 is pre-vaccination with PCV, Day 30 is 30 days following vaccination with PCV, Month 6 is 6 months following vaccination with PCV and pre-vaccination with PPSV23, and Month 7 is 30 days following vaccination with PPSV23.

CI: confidence interval; GMT: geometric mean titer (1/dilution); OPA: opsonophagocytic activity; PCV: pneumococcal conjugate vaccine; PCV13: 13-valent pneumococcal conjugate vaccine; PPSV23: 23-valent pneumococcal polysaccharide vaccine; V114: 15-valent pneumococcal conjugate vaccine.

†The within-group 95% CIs are obtained by exponentiating the CIs of the mean of the natural log values based on the t-distribution.

**Supplemental Table 13. Summary of IgG GMCs for participants with only chronic heart disease**

| Pneumococcal Serotype |           | V114<br>N = 57 |              |           | PCV13<br>N = 20 |              |            |
|-----------------------|-----------|----------------|--------------|-----------|-----------------|--------------|------------|
| 13 Shared Serotypes   | Timepoint | n              | Observed GMC | 95% CI†   | n               | Observed GMC | 95% CI†    |
| <b>1</b>              | Day 1     | 51             | 0.43         | 0.28–0.66 | 18              | 0.39         | 0.22–0.69  |
|                       | Day 30    | 47             | 4.14         | 2.77–6.20 | 17              | 3.51         | 1.98–6.22  |
|                       | Month 6   | 40             | 2.53         | 1.68–3.79 | 16              | 2.82         | 1.39–5.72  |
|                       | Month 7   | 30             | 4.35         | 2.89–6.54 | 11              | 4.28         | 2.21–8.30  |
| <b>3</b>              | Day 1     | 51             | 0.18         | 0.12–0.27 | 18              | 0.16         | 0.09–0.29  |
|                       | Day 30    | 47             | 0.95         | 0.67–1.33 | 17              | 0.57         | 0.32–1.01  |
|                       | Month 6   | 40             | 0.63         | 0.43–0.94 | 16              | 0.32         | 0.18–0.57  |
|                       | Month 7   | 30             | 0.97         | 0.66–1.44 | 11              | 0.85         | 0.48–1.51  |
| <b>4</b>              | Day 1     | 51             | 0.36         | 0.27–0.48 | 18              | 0.16         | 0.08–0.33  |
|                       | Day 30    | 47             | 2.68         | 1.78–4.04 | 17              | 2.55         | 1.28–5.07  |
|                       | Month 6   | 40             | 1.39         | 0.93–2.09 | 16              | 0.92         | 0.47–1.77  |
|                       | Month 7   | 30             | 2.33         | 1.59–3.42 | 11              | 1.94         | 0.94–4.00  |
| <b>5</b>              | Day 1     | 51             | 0.94         | 0.77–1.15 | 18              | 0.99         | 0.61–1.61  |
|                       | Day 30    | 47             | 4.34         | 2.93–6.43 | 17              | 6.43         | 2.85–14.50 |

---

|           |         |    |       |             |    |       |            |
|-----------|---------|----|-------|-------------|----|-------|------------|
|           | Month 6 | 40 | 2.12  | 1.50–3.00   | 16 | 4.49  | 2.04–9.88  |
|           | Month 7 | 30 | 4.35  | 2.90–6.52   | 11 | 10.78 | 4.24–27.38 |
| <b>6A</b> | Day 1   | 51 | 0.51  | 0.32–0.81   | 18 | 0.31  | 0.14–0.66  |
|           | Day 30  | 47 | 14.78 | 8.54–25.58  | 17 | 8.78  | 2.89–26.71 |
|           | Month 6 | 40 | 6.41  | 3.83–10.72  | 16 | 4.87  | 1.51–15.76 |
|           | Month 7 | 30 | 6.45  | 3.38–12.33  | 11 | 6.80  | 1.88–24.62 |
| <b>6B</b> | Day 1   | 51 | 0.80  | 0.51–1.25   | 18 | 0.46  | 0.22–0.95  |
|           | Day 30  | 47 | 21.39 | 13.10–34.92 | 17 | 8.92  | 2.93–27.19 |
|           | Month 6 | 40 | 11.20 | 7.34–17.08  | 16 | 5.18  | 1.56–17.20 |
|           | Month 7 | 30 | 12.52 | 7.61–20.58  | 11 | 7.07  | 1.92–26.04 |
| <b>7F</b> | Day 1   | 51 | 0.76  | 0.55–1.06   | 18 | 0.31  | 0.20–0.48  |
|           | Day 30  | 47 | 8.87  | 6.33–12.44  | 17 | 6.30  | 3.54–11.18 |
|           | Month 6 | 40 | 5.00  | 3.44–7.27   | 16 | 3.85  | 2.09–7.10  |
|           | Month 7 | 30 | 6.06  | 3.80–9.65   | 11 | 5.59  | 3.08–10.14 |
| <b>9V</b> | Day 1   | 51 | 0.64  | 0.45–0.92   | 18 | 0.31  | 0.17–0.57  |
|           | Day 30  | 47 | 7.33  | 5.28–10.17  | 17 | 3.96  | 1.97–7.95  |
|           | Month 6 | 40 | 4.09  | 2.87–5.82   | 16 | 2.46  | 1.09–5.54  |
|           | Month 7 | 30 | 6.19  | 4.21–9.08   | 11 | 3.66  | 1.37–9.75  |
| <b>14</b> | Day 1   | 51 | 3.05  | 1.85–5.04   | 18 | 1.15  | 0.48–2.75  |

---

---

|            |         |    |       |             |    |       |            |
|------------|---------|----|-------|-------------|----|-------|------------|
|            | Day 30  | 47 | 23.75 | 15.66–36.04 | 17 | 9.39  | 4.61–19.13 |
|            | Month 6 | 40 | 17.81 | 11.43–27.74 | 16 | 8.81  | 3.92–19.78 |
|            | Month 7 | 30 | 23.96 | 14.16–40.56 | 11 | 16.19 | 5.47–47.85 |
| <b>18C</b> | Day 1   | 51 | 0.74  | 0.53–1.02   | 18 | 0.54  | 0.29–0.99  |
|            | Day 30  | 47 | 24.20 | 16.88–34.71 | 17 | 6.78  | 3.34–13.77 |
|            | Month 6 | 40 | 9.60  | 6.53–14.11  | 16 | 4.02  | 2.24–7.19  |
|            | Month 7 | 30 | 10.07 | 6.39–15.89  | 11 | 3.55  | 1.87–6.77  |
| <b>19A</b> | Day 1   | 51 | 1.74  | 1.29–2.35   | 18 | 1.16  | 0.70–1.93  |
|            | Day 30  | 47 | 16.27 | 11.34–23.35 | 17 | 11.61 | 5.48–24.61 |
|            | Month 6 | 40 | 7.18  | 4.99–10.34  | 16 | 6.42  | 3.01–13.68 |
|            | Month 7 | 30 | 10.12 | 6.27–16.33  | 11 | 7.86  | 2.84–21.76 |
| <b>19F</b> | Day 1   | 51 | 1.24  | 0.84–1.82   | 18 | 0.72  | 0.40–1.32  |
|            | Day 30  | 47 | 12.62 | 8.73–18.24  | 17 | 6.87  | 3.77–12.51 |
|            | Month 6 | 40 | 5.99  | 4.16–8.63   | 16 | 3.60  | 1.78–7.29  |
|            | Month 7 | 30 | 9.19  | 6.06–13.93  | 11 | 5.25  | 2.05–13.49 |
| <b>23F</b> | Day 1   | 51 | 0.62  | 0.40–0.95   | 18 | 0.32  | 0.17–0.59  |
|            | Day 30  | 47 | 10.77 | 6.90–16.80  | 17 | 4.91  | 2.70–8.93  |
|            | Month 6 | 40 | 4.57  | 2.98–7.01   | 16 | 2.46  | 1.32–4.59  |
|            | Month 7 | 30 | 4.93  | 2.82–8.60   | 11 | 3.05  | 1.32–7.05  |

---



## 2 Additional Serotypes in V114

|            |         |    |      |            |    |       |            |
|------------|---------|----|------|------------|----|-------|------------|
| <b>22F</b> | Day 1   | 51 | 0.32 | 0.21–0.47  | 18 | 0.41  | 0.23–0.74  |
|            | Day 30  | 47 | 7.54 | 5.01–11.36 | 17 | 0.40  | 0.22–0.74  |
|            | Month 6 | 40 | 3.45 | 2.26–5.27  | 16 | 0.40  | 0.21–0.75  |
|            | Month 7 | 30 | 4.98 | 3.13–7.93  | 11 | 6.24  | 2.64–14.74 |
| <b>33F</b> | Day 1   | 51 | 1.29 | 0.90–1.85  | 18 | 0.85  | 0.54–1.32  |
|            | Day 30  | 47 | 8.68 | 5.49–13.72 | 17 | 0.90  | 0.51–1.58  |
|            | Month 6 | 40 | 5.74 | 3.64–9.07  | 16 | 0.94  | 0.62–1.41  |
|            | Month 7 | 30 | 8.72 | 5.30–14.34 | 11 | 12.90 | 4.28–38.95 |

N is the number of participants randomized and vaccinated; n is the number of participants contributing to the analysis. Per protocol, Day 1 is pre-vaccination with PCV, Day 30 is 30 days following vaccination with PCV, Month 6 is 6 months following vaccination with PCV and pre-vaccination with PPSV23, and Month 7 is 30 days following vaccination with PPSV23.

CI: confidence interval; GMC: geometric mean concentration; IgG: immunoglobulin G; PCV: pneumococcal conjugate vaccine; PCV13: 13-valent pneumococcal conjugate vaccine; PPSV23: 23-valent pneumococcal polysaccharide vaccine; V114: 15-valent pneumococcal conjugate vaccine.

<sup>†</sup>The within-group 95% CIs are obtained by exponentiating the CIs of the mean of the natural log values based on the t-distribution.

**Supplemental Table 14. Summary of IgG GMCs for participants with only chronic liver disease or only alcohol consumption**

| Pneumococcal Serotype |           | V114<br>N = 78 |              |                     | PCV13<br>N = 27 |              |                     |
|-----------------------|-----------|----------------|--------------|---------------------|-----------------|--------------|---------------------|
| 13 Shared Serotypes   | Timepoint | n              | Observed GMC | 95% CI <sup>†</sup> | n               | Observed GMC | 95% CI <sup>†</sup> |
| <b>1</b>              | Day 1     | 78             | 0.22         | 0.17–0.29           | 27              | 0.33         | 0.19–0.55           |
|                       | Day 30    | 70             | 3.08         | 2.22–4.27           | 23              | 4.49         | 2.38–8.45           |
|                       | Month 6   | 62             | 1.12         | 0.77–1.62           | 25              | 1.86         | 1.01–3.45           |
|                       | Month 7   | 58             | 2.56         | 1.93–3.41           | 23              | 2.93         | 1.75–4.91           |
| <b>3</b>              | Day 1     | 78             | 0.16         | 0.12–0.22           | 27              | 0.16         | 0.11–0.23           |
|                       | Day 30    | 70             | 0.84         | 0.65–1.09           | 23              | 0.68         | 0.47–0.98           |
|                       | Month 6   | 62             | 0.43         | 0.33–0.57           | 25              | 0.31         | 0.21–0.44           |
|                       | Month 7   | 58             | 0.73         | 0.56–0.95           | 23              | 0.67         | 0.44–1.01           |
| <b>4</b>              | Day 1     | 78             | 0.17         | 0.14–0.22           | 27              | 0.14         | 0.10–0.20           |
|                       | Day 30    | 69             | 1.21         | 0.87–1.68           | 23              | 2.62         | 1.59–4.32           |
|                       | Month 6   | 62             | 0.54         | 0.38–0.77           | 25              | 0.89         | 0.52–1.53           |
|                       | Month 7   | 58             | 1.13         | 0.83–1.54           | 23              | 1.63         | 1.04–2.56           |
| <b>5</b>              | Day 1     | 78             | 0.56         | 0.48–0.66           | 27              | 0.80         | 0.54–1.17           |
|                       | Day 30    | 70             | 2.26         | 1.69–3.03           | 23              | 3.84         | 2.03–7.28           |

---

|           |         |    |       |             |    |       |            |
|-----------|---------|----|-------|-------------|----|-------|------------|
|           | Month 6 | 62 | 1.22  | 0.95–1.57   | 25 | 1.83  | 1.11–3.04  |
|           | Month 7 | 58 | 2.38  | 1.77–3.21   | 23 | 3.20  | 1.96–5.21  |
| <b>6A</b> | Day 1   | 78 | 0.28  | 0.21–0.38   | 27 | 0.32  | 0.17–0.59  |
|           | Day 30  | 70 | 12.36 | 8.34–18.32  | 23 | 14.02 | 6.72–29.28 |
|           | Month 6 | 62 | 4.01  | 2.71–5.94   | 25 | 4.57  | 2.19–9.54  |
|           | Month 7 | 58 | 3.84  | 2.57–5.73   | 23 | 4.63  | 2.22–9.67  |
| <b>6B</b> | Day 1   | 78 | 0.38  | 0.29–0.51   | 27 | 0.43  | 0.25–0.74  |
|           | Day 30  | 70 | 18.62 | 12.99–26.70 | 23 | 12.49 | 6.10–25.58 |
|           | Month 6 | 62 | 6.22  | 4.31–8.96   | 25 | 4.33  | 2.13–8.79  |
|           | Month 7 | 58 | 6.45  | 4.45–9.33   | 23 | 6.08  | 3.09–11.98 |
| <b>7F</b> | Day 1   | 78 | 0.35  | 0.28–0.45   | 27 | 0.39  | 0.25–0.61  |
|           | Day 30  | 70 | 6.07  | 4.35–8.47   | 23 | 6.21  | 3.43–11.24 |
|           | Month 6 | 62 | 2.26  | 1.59–3.20   | 25 | 2.10  | 1.19–3.70  |
|           | Month 7 | 58 | 3.52  | 2.63–4.72   | 23 | 3.69  | 2.25–6.04  |
| <b>9V</b> | Day 1   | 78 | 0.50  | 0.38–0.66   | 27 | 0.41  | 0.27–0.63  |
|           | Day 30  | 70 | 5.55  | 3.99–7.74   | 23 | 6.97  | 4.12–11.79 |
|           | Month 6 | 62 | 2.46  | 1.77–3.40   | 25 | 2.87  | 1.63–5.03  |
|           | Month 7 | 58 | 3.79  | 2.81–5.12   | 23 | 3.38  | 2.00–5.71  |
| <b>14</b> | Day 1   | 78 | 1.22  | 0.87–1.73   | 27 | 1.45  | 0.74–2.85  |

---

---

|            |         |    |       |             |    |       |             |
|------------|---------|----|-------|-------------|----|-------|-------------|
|            | Day 30  | 70 | 15.12 | 10.59–21.57 | 23 | 24.22 | 11.74–49.94 |
|            | Month 6 | 62 | 6.67  | 4.66–9.55   | 25 | 10.36 | 5.18–20.70  |
|            | Month 7 | 58 | 11.06 | 7.85–15.60  | 23 | 12.90 | 6.44–25.86  |
| <b>18C</b> | Day 1   | 78 | 0.50  | 0.38–0.65   | 27 | 0.29  | 0.19–0.46   |
|            | Day 30  | 70 | 15.93 | 11.75–21.60 | 23 | 7.33  | 3.27–16.46  |
|            | Month 6 | 62 | 5.06  | 3.63–7.06   | 25 | 2.79  | 1.55–5.04   |
|            | Month 7 | 58 | 5.25  | 3.80–7.27   | 23 | 3.22  | 1.77–5.85   |
| <b>19A</b> | Day 1   | 78 | 1.88  | 1.46–2.41   | 27 | 1.21  | 0.88–1.67   |
|            | Day 30  | 70 | 29.28 | 22.33–38.41 | 23 | 25.51 | 12.53–51.95 |
|            | Month 6 | 62 | 10.57 | 7.94–14.05  | 25 | 8.86  | 4.90–16.02  |
|            | Month 7 | 58 | 14.39 | 10.96–18.88 | 23 | 12.45 | 7.23–21.45  |
| <b>19F</b> | Day 1   | 78 | 0.87  | 0.66–1.16   | 27 | 0.71  | 0.47–1.08   |
|            | Day 30  | 70 | 18.45 | 13.67–24.89 | 23 | 21.26 | 12.53–36.09 |
|            | Month 6 | 62 | 6.23  | 4.40–8.83   | 25 | 7.17  | 4.50–11.42  |
|            | Month 7 | 58 | 9.65  | 7.08–13.15  | 23 | 11.89 | 8.25–17.12  |
| <b>23F</b> | Day 1   | 78 | 0.41  | 0.31–0.55   | 27 | 0.47  | 0.27–0.82   |
|            | Day 30  | 70 | 16.73 | 11.99–23.34 | 23 | 13.66 | 7.27–25.69  |
|            | Month 6 | 61 | 4.46  | 3.15–6.34   | 25 | 4.71  | 2.59–8.56   |
|            | Month 7 | 58 | 5.16  | 3.77–7.06   | 23 | 5.30  | 2.94–9.52   |

---

## 2 Additional Serotypes in V114

|            |         |    |      |            |    |      |            |
|------------|---------|----|------|------------|----|------|------------|
| <b>22F</b> | Day 1   | 78 | 0.67 | 0.50–0.90  | 27 | 0.70 | 0.42–1.16  |
|            | Day 30  | 70 | 7.66 | 5.80–10.12 | 23 | 0.70 | 0.40–1.22  |
|            | Month 6 | 62 | 2.96 | 2.28–3.84  | 25 | 0.74 | 0.45–1.23  |
|            | Month 7 | 58 | 5.15 | 4.07–6.52  | 23 | 4.89 | 2.41–9.94  |
| <b>33F</b> | Day 1   | 78 | 1.02 | 0.76–1.38  | 27 | 0.91 | 0.61–1.35  |
|            | Day 30  | 70 | 8.59 | 5.94–12.41 | 23 | 0.92 | 0.59–1.43  |
|            | Month 6 | 62 | 3.83 | 2.68–5.48  | 25 | 0.79 | 0.52–1.21  |
|            | Month 7 | 58 | 6.30 | 4.60–8.64  | 23 | 7.85 | 4.79–12.85 |

N is the number of participants randomized and vaccinated; n is the number of participants contributing to the analysis. Per protocol, Day 1 is pre-vaccination with PCV, Day 30 is 30 days following vaccination with PCV, Month 6 is 6 months following vaccination with PCV and pre-vaccination with PPSV23, and Month 7 is 30 days following vaccination with PPSV23.

CI: confidence interval; GMC: geometric mean concentration; IgG: immunoglobulin G; PCV: pneumococcal conjugate vaccine; PCV13: 13-valent pneumococcal conjugate vaccine; PPSV23: 23-valent pneumococcal polysaccharide vaccine; V114: 15-valent pneumococcal conjugate vaccine.

†The within-group 95% CIs are obtained by exponentiating the CIs of the mean of the natural log values based on the t-distribution.

**Supplemental Table 15. Summary of IgG GMCs for participants with only chronic lung disease**

| Pneumococcal Serotype |           | V114<br>N = 163 |              |                     | PCV13<br>N = 53 |              |                     |
|-----------------------|-----------|-----------------|--------------|---------------------|-----------------|--------------|---------------------|
| 13 Shared Serotypes   | Timepoint | n               | Observed GMC | 95% CI <sup>†</sup> | n               | Observed GMC | 95% CI <sup>†</sup> |
| <b>1</b>              | Day 1     | 151             | 0.36         | 0.30–0.43           | 51              | 0.34         | 0.23–0.50           |
|                       | Day 30    | 141             | 4.35         | 3.49–5.41           | 48              | 4.83         | 3.29–7.09           |
|                       | Month 6   | 128             | 1.86         | 1.51–2.29           | 44              | 3.45         | 2.32–5.12           |
|                       | Month 7   | 115             | 3.60         | 2.99–4.35           | 41              | 4.34         | 3.14–6.01           |
| <b>3</b>              | Day 1     | 151             | 0.21         | 0.18–0.26           | 51              | 0.19         | 0.14–0.26           |
|                       | Day 30    | 140             | 0.93         | 0.79–1.11           | 48              | 0.76         | 0.56–1.04           |
|                       | Month 6   | 126             | 0.50         | 0.42–0.61           | 44              | 0.50         | 0.35–0.71           |
|                       | Month 7   | 115             | 0.87         | 0.72–1.05           | 41              | 0.97         | 0.72–1.29           |
| <b>4</b>              | Day 1     | 151             | 0.18         | 0.15–0.22           | 51              | 0.21         | 0.15–0.28           |
|                       | Day 30    | 138             | 2.01         | 1.65–2.46           | 48              | 4.21         | 2.91–6.08           |
|                       | Month 6   | 128             | 0.95         | 0.77–1.17           | 44              | 1.82         | 1.27–2.62           |
|                       | Month 7   | 115             | 1.70         | 1.38–2.08           | 41              | 2.76         | 1.96–3.89           |
| <b>5</b>              | Day 1     | 151             | 0.84         | 0.74–0.95           | 51              | 0.82         | 0.63–1.06           |
|                       | Day 30    | 141             | 4.22         | 3.33–5.34           | 48              | 4.25         | 2.57–7.01           |

---

|           |         |     |       |             |    |      |            |
|-----------|---------|-----|-------|-------------|----|------|------------|
|           | Month 6 | 128 | 2.08  | 1.68–2.58   | 44 | 3.17 | 2.00–5.03  |
|           | Month 7 | 115 | 3.74  | 2.98–4.69   | 41 | 4.56 | 3.01–6.88  |
| <b>6A</b> | Day 1   | 151 | 0.36  | 0.28–0.46   | 51 | 0.30 | 0.21–0.45  |
|           | Day 30  | 141 | 15.47 | 12.17–19.67 | 48 | 9.90 | 5.99–16.39 |
|           | Month 6 | 128 | 6.17  | 4.80–7.93   | 44 | 5.84 | 3.64–9.36  |
|           | Month 7 | 114 | 6.49  | 5.12–8.21   | 41 | 6.13 | 3.82–9.83  |
| <b>6B</b> | Day 1   | 151 | 0.45  | 0.36–0.55   | 51 | 0.34 | 0.24–0.49  |
|           | Day 30  | 141 | 20.88 | 16.40–26.57 | 48 | 9.19 | 5.60–15.07 |
|           | Month 6 | 128 | 7.99  | 6.23–10.25  | 44 | 5.27 | 3.28–8.47  |
|           | Month 7 | 115 | 8.93  | 6.97–11.43  | 41 | 6.67 | 4.27–10.40 |
| <b>7F</b> | Day 1   | 151 | 0.45  | 0.36–0.56   | 51 | 0.56 | 0.41–0.77  |
|           | Day 30  | 141 | 4.84  | 3.90–6.01   | 48 | 7.90 | 5.36–11.65 |
|           | Month 6 | 128 | 2.36  | 1.89–2.94   | 44 | 4.62 | 3.10–6.86  |
|           | Month 7 | 115 | 4.12  | 3.35–5.08   | 41 | 6.08 | 4.02–9.18  |
| <b>9V</b> | Day 1   | 151 | 0.41  | 0.34–0.50   | 51 | 0.40 | 0.27–0.60  |
|           | Day 30  | 141 | 4.63  | 3.71–5.78   | 48 | 3.98 | 2.66–5.94  |
|           | Month 6 | 127 | 2.39  | 1.90–3.01   | 44 | 2.17 | 1.46–3.23  |
|           | Month 7 | 115 | 3.00  | 2.44–3.68   | 41 | 3.80 | 2.56–5.64  |
| <b>14</b> | Day 1   | 151 | 1.59  | 1.23–2.05   | 51 | 1.59 | 1.01–2.51  |

---

---

|            |         |     |       |             |    |       |             |
|------------|---------|-----|-------|-------------|----|-------|-------------|
|            | Day 30  | 141 | 16.80 | 12.76–22.13 | 48 | 16.27 | 11.19–23.67 |
|            | Month 6 | 128 | 11.11 | 8.41–14.68  | 44 | 11.03 | 7.36–16.53  |
|            | Month 7 | 115 | 15.47 | 12.10–19.78 | 41 | 15.66 | 10.74–22.82 |
| <b>18C</b> | Day 1   | 151 | 0.48  | 0.40–0.58   | 51 | 0.45  | 0.30–0.67   |
|            | Day 30  | 141 | 15.37 | 12.55–18.83 | 48 | 6.55  | 4.24–10.12  |
|            | Month 6 | 128 | 6.68  | 5.41–8.26   | 44 | 3.54  | 2.31–5.44   |
|            | Month 7 | 115 | 6.42  | 5.13–8.03   | 41 | 4.14  | 2.80–6.12   |
| <b>19A</b> | Day 1   | 151 | 1.63  | 1.36–1.95   | 51 | 1.48  | 1.07–2.06   |
|            | Day 30  | 141 | 15.91 | 12.95–19.55 | 48 | 15.39 | 10.08–23.48 |
|            | Month 6 | 128 | 7.74  | 6.28–9.55   | 44 | 7.99  | 5.13–12.47  |
|            | Month 7 | 115 | 11.09 | 8.97–13.71  | 41 | 11.44 | 7.61–17.22  |
| <b>19F</b> | Day 1   | 151 | 0.89  | 0.71–1.12   | 51 | 0.62  | 0.42–0.91   |
|            | Day 30  | 140 | 11.40 | 9.18–14.17  | 48 | 7.42  | 5.05–10.90  |
|            | Month 6 | 128 | 5.10  | 4.13–6.30   | 44 | 3.59  | 2.34–5.49   |
|            | Month 7 | 115 | 9.14  | 7.67–10.89  | 41 | 6.43  | 4.49–9.21   |
| <b>23F</b> | Day 1   | 151 | 0.46  | 0.37–0.59   | 51 | 0.60  | 0.39–0.91   |
|            | Day 30  | 140 | 15.17 | 12.18–18.90 | 48 | 8.80  | 5.52–14.03  |
|            | Month 6 | 128 | 6.14  | 4.92–7.65   | 44 | 4.63  | 2.80–7.67   |
|            | Month 7 | 115 | 6.32  | 4.99–7.99   | 41 | 5.28  | 3.35–8.33   |

---



## 2 Additional Serotypes in V114

|            |         |     |      |           |    |      |            |
|------------|---------|-----|------|-----------|----|------|------------|
| <b>22F</b> | Day 1   | 151 | 0.38 | 0.30–0.48 | 51 | 0.32 | 0.22–0.46  |
|            | Day 30  | 141 | 6.50 | 5.18–8.15 | 48 | 0.35 | 0.24–0.53  |
|            | Month 6 | 128 | 2.76 | 2.25–3.39 | 44 | 0.39 | 0.25–0.59  |
|            | Month 7 | 115 | 5.36 | 4.44–6.48 | 41 | 7.99 | 4.97–12.86 |
| <b>33F</b> | Day 1   | 151 | 0.88 | 0.71–1.08 | 51 | 0.87 | 0.58–1.30  |
|            | Day 30  | 141 | 7.88 | 6.35–9.78 | 48 | 0.81 | 0.55–1.20  |
|            | Month 6 | 128 | 3.92 | 3.16–4.86 | 44 | 1.01 | 0.62–1.62  |
|            | Month 7 | 115 | 5.85 | 4.69–7.29 | 41 | 8.96 | 5.48–14.63 |

N is the number of participants randomized and vaccinated; n is the number of participants contributing to the analysis. Per protocol, Day 1 is pre-vaccination with PCV, Day 30 is 30 days following vaccination with PCV, Month 6 is 6 months following vaccination with PCV and pre-vaccination with PPSV23, and Month 7 is 30 days following vaccination with PPSV23.

CI: confidence interval; GMC: geometric mean concentration; IgG: immunoglobulin G; PCV: pneumococcal conjugate vaccine; PCV13: 13-valent pneumococcal conjugate vaccine; PPSV23: 23-valent pneumococcal polysaccharide vaccine; V114: 15-valent pneumococcal conjugate vaccine.

<sup>†</sup>The within-group 95% CIs are obtained by exponentiating the CIs of the mean of the natural log values based on the t-distribution.

**Supplemental Table 16. Summary of IgG GMCs for participants with only diabetes mellitus**

| Pneumococcal Serotype |           | V114<br>N = 157 |              |           | PCV13<br>N = 51 |              |            |
|-----------------------|-----------|-----------------|--------------|-----------|-----------------|--------------|------------|
| 13 Shared Serotypes   | Timepoint | n               | Observed GMC | 95% CI†   | n               | Observed GMC | 95% CI†    |
| <b>1</b>              | Day 1     | 154             | 0.36         | 0.30–0.43 | 49              | 0.36         | 0.28–0.47  |
|                       | Day 30    | 143             | 5.14         | 4.20–6.28 | 48              | 6.42         | 4.33–9.53  |
|                       | Month 6   | 140             | 2.26         | 1.83–2.78 | 40              | 2.91         | 1.90–4.46  |
|                       | Month 7   | 126             | 3.99         | 3.40–4.68 | 38              | 4.63         | 3.17–6.78  |
| <b>3</b>              | Day 1     | 154             | 0.17         | 0.14–0.20 | 49              | 0.14         | 0.10–0.19  |
|                       | Day 30    | 142             | 0.87         | 0.74–1.03 | 48              | 0.67         | 0.46–0.97  |
|                       | Month 6   | 140             | 0.45         | 0.38–0.54 | 40              | 0.38         | 0.25–0.58  |
|                       | Month 7   | 126             | 0.72         | 0.62–0.83 | 38              | 0.76         | 0.53–1.11  |
| <b>4</b>              | Day 1     | 153             | 0.20         | 0.17–0.25 | 49              | 0.17         | 0.13–0.23  |
|                       | Day 30    | 143             | 2.17         | 1.76–2.67 | 48              | 3.73         | 2.42–5.75  |
|                       | Month 6   | 140             | 1.02         | 0.83–1.26 | 40              | 1.40         | 0.86–2.29  |
|                       | Month 7   | 126             | 1.85         | 1.54–2.23 | 38              | 2.51         | 1.73–3.63  |
| <b>5</b>              | Day 1     | 154             | 0.79         | 0.70–0.90 | 49              | 0.84         | 0.69–1.02  |
|                       | Day 30    | 143             | 4.47         | 3.49–5.73 | 48              | 7.55         | 4.83–11.81 |

---

|           |         |     |       |             |    |       |            |
|-----------|---------|-----|-------|-------------|----|-------|------------|
|           | Month 6 | 140 | 2.42  | 1.96–3.00   | 40 | 4.38  | 2.93–6.55  |
|           | Month 7 | 126 | 4.49  | 3.62–5.56   | 38 | 6.03  | 4.24–8.59  |
| <b>6A</b> | Day 1   | 154 | 0.34  | 0.27–0.43   | 49 | 0.28  | 0.19–0.40  |
|           | Day 30  | 143 | 12.02 | 9.08–15.92  | 48 | 11.26 | 6.72–18.87 |
|           | Month 6 | 140 | 5.14  | 4.00–6.62   | 40 | 4.46  | 2.67–7.43  |
|           | Month 7 | 126 | 5.24  | 4.05–6.78   | 38 | 4.72  | 2.89–7.73  |
| <b>6B</b> | Day 1   | 154 | 0.40  | 0.32–0.51   | 49 | 0.40  | 0.28–0.58  |
|           | Day 30  | 143 | 16.67 | 12.68–21.92 | 48 | 12.27 | 7.49–20.10 |
|           | Month 6 | 140 | 6.60  | 5.13–8.50   | 40 | 5.65  | 3.27–9.75  |
|           | Month 7 | 126 | 7.45  | 5.81–9.56   | 38 | 6.61  | 3.95–11.06 |
| <b>7F</b> | Day 1   | 154 | 0.46  | 0.37–0.57   | 49 | 0.33  | 0.24–0.46  |
|           | Day 30  | 143 | 7.96  | 6.33–10.01  | 48 | 7.85  | 5.42–11.36 |
|           | Month 6 | 140 | 3.46  | 2.76–4.34   | 40 | 3.04  | 2.02–4.58  |
|           | Month 7 | 126 | 5.29  | 4.32–6.49   | 38 | 4.17  | 2.87–6.05  |
| <b>9V</b> | Day 1   | 154 | 0.38  | 0.32–0.45   | 49 | 0.43  | 0.32–0.59  |
|           | Day 30  | 143 | 5.15  | 4.16–6.39   | 48 | 7.80  | 5.46–11.16 |
|           | Month 6 | 140 | 2.45  | 2.02–2.96   | 40 | 3.73  | 2.49–5.60  |
|           | Month 7 | 126 | 3.66  | 3.05–4.38   | 38 | 5.61  | 4.02–7.84  |
| <b>14</b> | Day 1   | 154 | 1.66  | 1.26–2.19   | 49 | 1.73  | 1.07–2.80  |

---

---

|            |         |     |       |             |    |       |             |
|------------|---------|-----|-------|-------------|----|-------|-------------|
|            | Day 30  | 143 | 16.69 | 12.65–22.01 | 48 | 17.75 | 12.54–25.11 |
|            | Month 6 | 139 | 10.12 | 7.84–13.05  | 40 | 12.04 | 8.74–16.57  |
|            | Month 7 | 126 | 17.32 | 13.84–21.66 | 38 | 17.87 | 12.39–25.76 |
| <b>18C</b> | Day 1   | 154 | 0.58  | 0.48–0.69   | 49 | 0.40  | 0.29–0.54   |
|            | Day 30  | 143 | 17.95 | 14.08–22.88 | 48 | 14.28 | 10.57–19.31 |
|            | Month 6 | 140 | 7.31  | 5.84–9.14   | 40 | 4.80  | 3.41–6.76   |
|            | Month 7 | 126 | 7.58  | 6.13–9.36   | 38 | 4.82  | 3.65–6.36   |
| <b>19A</b> | Day 1   | 154 | 1.65  | 1.40–1.96   | 49 | 1.20  | 0.90–1.60   |
|            | Day 30  | 143 | 18.80 | 15.17–23.30 | 48 | 23.31 | 15.28–35.55 |
|            | Month 6 | 139 | 8.51  | 7.01–10.33  | 40 | 8.98  | 5.90–13.66  |
|            | Month 7 | 126 | 11.94 | 9.88–14.43  | 38 | 12.42 | 8.52–18.10  |
| <b>19F</b> | Day 1   | 154 | 0.80  | 0.65–1.00   | 49 | 0.81  | 0.57–1.15   |
|            | Day 30  | 143 | 12.56 | 9.83–16.06  | 48 | 16.96 | 11.22–25.62 |
|            | Month 6 | 140 | 5.41  | 4.32–6.77   | 40 | 6.47  | 4.26–9.81   |
|            | Month 7 | 126 | 8.67  | 7.16–10.50  | 38 | 10.68 | 7.56–15.09  |
| <b>23F</b> | Day 1   | 154 | 0.51  | 0.41–0.63   | 49 | 0.52  | 0.35–0.75   |
|            | Day 30  | 143 | 15.01 | 11.59–19.43 | 48 | 15.50 | 10.48–22.94 |
|            | Month 6 | 140 | 6.22  | 4.92–7.86   | 40 | 6.78  | 4.41–10.44  |
|            | Month 7 | 126 | 7.05  | 5.70–8.72   | 38 | 7.19  | 4.85–10.67  |

---

## 2 Additional Serotypes in V114

|            |         |     |      |            |    |       |            |
|------------|---------|-----|------|------------|----|-------|------------|
| <b>22F</b> | Day 1   | 154 | 0.43 | 0.35–0.54  | 49 | 0.44  | 0.29–0.66  |
|            | Day 30  | 143 | 6.59 | 5.28–8.23  | 48 | 0.47  | 0.32–0.70  |
|            | Month 6 | 140 | 2.78 | 2.28–3.39  | 40 | 0.46  | 0.30–0.70  |
|            | Month 7 | 126 | 5.08 | 4.19–6.16  | 38 | 5.88  | 3.74–9.23  |
| <b>33F</b> | Day 1   | 154 | 0.97 | 0.81–1.17  | 49 | 0.97  | 0.69–1.37  |
|            | Day 30  | 143 | 8.75 | 6.93–11.05 | 47 | 1.05  | 0.76–1.46  |
|            | Month 6 | 140 | 4.59 | 3.65–5.76  | 40 | 1.03  | 0.73–1.46  |
|            | Month 7 | 126 | 7.09 | 5.73–8.76  | 38 | 15.24 | 9.30–24.97 |

N is the number of participants randomized and vaccinated; n is the number of participants contributing to the analysis. Per protocol, Day 1 is pre-vaccination with PCV, Day 30 is 30 days following vaccination with PCV, Month 6 is 6 months following vaccination with PCV and pre-vaccination with PPSV23, and Month 7 is 30 days following vaccination with PPSV23.

CI: confidence interval; GMC: geometric mean concentration; IgG: immunoglobulin G; PCV: pneumococcal conjugate vaccine; PCV13: 13-valent pneumococcal conjugate vaccine; PPSV23: 23-valent pneumococcal polysaccharide vaccine; V114: 15-valent pneumococcal conjugate vaccine.

†The within-group 95% CIs are obtained by exponentiating the CIs of the mean of the natural log values based on the t-distribution.

**Supplemental Table 17. Summary of IgG GMCs for participants with only tobacco use**

| Pneumococcal Serotype |           | V114<br>N = 165 |              |                     | PCV13<br>N = 56 |              |                     |
|-----------------------|-----------|-----------------|--------------|---------------------|-----------------|--------------|---------------------|
| 13 Shared Serotypes   | Timepoint | n               | Observed GMC | 95% CI <sup>†</sup> | n               | Observed GMC | 95% CI <sup>†</sup> |
| <b>1</b>              | Day 1     | 165             | 0.25         | 0.22–0.29           | 56              | 0.25         | 0.18–0.34           |
|                       | Day 30    | 152             | 3.30         | 2.73–4.00           | 50              | 4.35         | 3.02–6.27           |
|                       | Month 6   | 133             | 1.38         | 1.13–1.69           | 45              | 1.85         | 1.18–2.90           |
|                       | Month 7   | 117             | 2.52         | 2.08–3.07           | 39              | 3.14         | 2.24–4.41           |
| <b>3</b>              | Day 1     | 165             | 0.17         | 0.15–0.21           | 56              | 0.17         | 0.13–0.24           |
|                       | Day 30    | 152             | 0.73         | 0.61–0.87           | 50              | 0.66         | 0.48–0.91           |
|                       | Month 6   | 133             | 0.42         | 0.35–0.51           | 45              | 0.36         | 0.25–0.51           |
|                       | Month 7   | 117             | 0.62         | 0.51–0.74           | 39              | 0.63         | 0.46–0.86           |
| <b>4</b>              | Day 1     | 165             | 0.20         | 0.17–0.24           | 56              | 0.13         | 0.10–0.17           |
|                       | Day 30    | 152             | 1.60         | 1.29–1.98           | 50              | 2.15         | 1.47–3.14           |
|                       | Month 6   | 133             | 0.76         | 0.62–0.94           | 45              | 0.82         | 0.53–1.26           |
|                       | Month 7   | 117             | 1.18         | 0.97–1.44           | 38              | 1.20         | 0.80–1.80           |
| <b>5</b>              | Day 1     | 165             | 0.91         | 0.80–1.04           | 56              | 0.91         | 0.70–1.18           |
|                       | Day 30    | 152             | 3.05         | 2.45–3.80           | 50              | 3.94         | 2.54–6.11           |

---

|           |         |     |       |             |    |       |            |
|-----------|---------|-----|-------|-------------|----|-------|------------|
|           | Month 6 | 133 | 2.03  | 1.65–2.49   | 45 | 2.10  | 1.39–3.16  |
|           | Month 7 | 117 | 3.09  | 2.47–3.87   | 39 | 3.74  | 2.49–5.62  |
| <b>6A</b> | Day 1   | 165 | 0.33  | 0.27–0.41   | 56 | 0.24  | 0.17–0.34  |
|           | Day 30  | 152 | 10.06 | 7.80–12.95  | 50 | 10.20 | 6.75–15.41 |
|           | Month 6 | 133 | 4.53  | 3.54–5.80   | 45 | 3.59  | 2.34–5.52  |
|           | Month 7 | 117 | 3.94  | 3.03–5.12   | 39 | 4.10  | 2.61–6.43  |
| <b>6B</b> | Day 1   | 165 | 0.45  | 0.37–0.55   | 56 | 0.33  | 0.24–0.45  |
|           | Day 30  | 152 | 15.81 | 12.54–19.95 | 50 | 8.26  | 5.04–13.56 |
|           | Month 6 | 133 | 6.88  | 5.44–8.70   | 45 | 3.21  | 1.96–5.25  |
|           | Month 7 | 117 | 6.56  | 5.11–8.42   | 39 | 4.08  | 2.56–6.49  |
| <b>7F</b> | Day 1   | 165 | 0.38  | 0.32–0.45   | 56 | 0.37  | 0.25–0.54  |
|           | Day 30  | 152 | 4.18  | 3.40–5.15   | 50 | 7.43  | 4.91–11.25 |
|           | Month 6 | 133 | 1.96  | 1.58–2.42   | 45 | 2.80  | 1.78–4.41  |
|           | Month 7 | 117 | 3.27  | 2.62–4.07   | 39 | 4.23  | 2.81–6.38  |
| <b>9V</b> | Day 1   | 165 | 0.41  | 0.35–0.48   | 56 | 0.32  | 0.24–0.42  |
|           | Day 30  | 152 | 3.66  | 3.02–4.43   | 50 | 4.52  | 3.08–6.61  |
|           | Month 6 | 133 | 1.98  | 1.61–2.44   | 45 | 2.05  | 1.39–3.02  |
|           | Month 7 | 117 | 3.00  | 2.40–3.74   | 39 | 2.70  | 1.85–3.93  |
| <b>14</b> | Day 1   | 165 | 1.41  | 1.13–1.77   | 56 | 1.34  | 0.89–2.00  |

---

---

|            |         |     |       |             |    |       |             |
|------------|---------|-----|-------|-------------|----|-------|-------------|
|            | Day 30  | 152 | 15.85 | 12.39–20.27 | 50 | 19.07 | 11.62–31.29 |
|            | Month 6 | 133 | 9.23  | 7.19–11.83  | 45 | 11.62 | 7.29–18.51  |
|            | Month 7 | 117 | 15.13 | 11.84–19.33 | 39 | 14.45 | 9.39–22.22  |
| <b>18C</b> | Day 1   | 165 | 0.46  | 0.38–0.55   | 56 | 0.53  | 0.37–0.76   |
|            | Day 30  | 152 | 11.99 | 9.70–14.83  | 50 | 11.06 | 7.40–16.51  |
|            | Month 6 | 133 | 5.14  | 4.10–6.43   | 45 | 4.09  | 2.61–6.42   |
|            | Month 7 | 117 | 5.09  | 4.00–6.48   | 39 | 4.86  | 3.13–7.56   |
| <b>19A</b> | Day 1   | 165 | 1.75  | 1.51–2.02   | 56 | 1.58  | 1.15–2.15   |
|            | Day 30  | 152 | 18.03 | 14.83–21.93 | 50 | 20.49 | 13.68–30.69 |
|            | Month 6 | 133 | 8.66  | 7.28–10.31  | 45 | 7.95  | 5.05–12.52  |
|            | Month 7 | 117 | 10.99 | 8.93–13.52  | 39 | 10.92 | 7.19–16.58  |
| <b>19F</b> | Day 1   | 165 | 0.97  | 0.80–1.18   | 56 | 0.79  | 0.57–1.09   |
|            | Day 30  | 152 | 12.72 | 10.33–15.66 | 50 | 10.45 | 6.88–15.86  |
|            | Month 6 | 133 | 5.42  | 4.46–6.58   | 45 | 4.62  | 2.96–7.20   |
|            | Month 7 | 117 | 8.04  | 6.55–9.85   | 39 | 7.58  | 4.91–11.71  |
| <b>23F</b> | Day 1   | 165 | 0.52  | 0.43–0.63   | 56 | 0.51  | 0.38–0.68   |
|            | Day 30  | 152 | 12.35 | 9.84–15.51  | 50 | 10.29 | 6.79–15.61  |
|            | Month 6 | 133 | 5.23  | 4.14–6.61   | 45 | 4.38  | 2.80–6.85   |
|            | Month 7 | 117 | 5.08  | 3.97–6.50   | 39 | 4.97  | 3.24–7.62   |

---



## 2 Additional Serotypes in V114

|            |         |     |      |           |    |      |            |
|------------|---------|-----|------|-----------|----|------|------------|
| <b>22F</b> | Day 1   | 165 | 0.51 | 0.41–0.64 | 56 | 0.38 | 0.26–0.56  |
|            | Day 30  | 152 | 5.64 | 4.57–6.96 | 50 | 0.39 | 0.26–0.57  |
|            | Month 6 | 133 | 2.74 | 2.20–3.41 | 45 | 0.40 | 0.26–0.61  |
|            | Month 7 | 117 | 4.66 | 3.70–5.87 | 39 | 4.75 | 2.96–7.62  |
| <b>33F</b> | Day 1   | 165 | 0.88 | 0.73–1.06 | 56 | 0.87 | 0.61–1.25  |
|            | Day 30  | 152 | 6.84 | 5.48–8.54 | 50 | 0.81 | 0.57–1.16  |
|            | Month 6 | 133 | 3.63 | 2.88–4.56 | 45 | 0.70 | 0.50–0.97  |
|            | Month 7 | 117 | 5.43 | 4.21–7.01 | 39 | 7.20 | 4.61–11.26 |

N is the number of participants randomized and vaccinated; n is the number of participants contributing to the analysis. Per protocol, Day 1 is pre-vaccination with PCV, Day 30 is 30 days following vaccination with PCV, Month 6 is 6 months following vaccination with PCV and pre-vaccination with PPSV23, and Month 7 is 30 days following vaccination with PPSV23.

CI: confidence interval; GMC: geometric mean concentration; IgG: immunoglobulin G; PCV: pneumococcal conjugate vaccine; PCV13: 13-valent pneumococcal conjugate vaccine; PPSV23: 23-valent pneumococcal polysaccharide vaccine; V114: 15-valent pneumococcal conjugate vaccine.

<sup>†</sup>The within-group 95% CIs are obtained by exponentiating the CIs of the mean of the natural log values based on the t-distribution.
